# Supplementary material for: Identification of QTL controlling volatile terpene contents in tea plant (Camellia sinensis) using a high-aroma ‘Huangdan’ x ‘Jinxuan’ F1 population
Source: Front Plant Sci. 2023 Mar 29;14:1130582. doi: 10.3389/fpls.2023.1130582 (PMC10090551; doi:10.3389/fpls.2023.1130582)
Supplement: Supplementary file 2 [file Table_1.xlsx]

## Sheet: Table S1
#LG	MK	GD	CHROM	POS
lg01	np588	0	Chr01	7467342
lg01	np628	1.057	Chr01	16884708
lg01	np584	3.076	Chr01	6735751
lg01	np585	3.39	Chr01	6735909
lg01	np643	4.727	Chr01	24376478
lg01	np627	6.41	Chr01	16884703
lg01	np626	6.6	Chr01	15468975
lg01	np625	7.234	Chr01	15466484
lg01	np624	7.449	Chr01	15466475
lg01	np640	8.368	Chr01	21847066
lg01	np630	9.66	Chr01	17938380
lg01	np638	10.07	Chr01	21847058
lg01	np635	10.53	Chr01	21846860
lg01	np639	10.708	Chr01	21847061
lg01	np629	11.012	Chr01	17900858
lg01	np642	12.046	Chr01	24344250
lg01	np644	13.235	Chr01	24376634
lg01	np645	14.96	Chr01	24848302
lg01	np654	16.925	Chr01	30868055
lg01	np653	17.891	Chr01	29351261
lg01	np655	18.318	Chr01	31092198
lg01	np651	18.478	Chr01	27975657
lg01	np670	20.521	Chr01	34831892
lg01	np671	21.152	Chr01	35704878
lg01	np687	21.537	Chr01	46500277
lg01	np1063	22.442	Chr01	185417414
lg01	np1065	23.252	Chr01	186526887
lg01	np1064	23.637	Chr01	185753708
lg01	np1066	23.686	Chr01	186526908
lg01	np1062	23.804	Chr01	185286077
lg01	np1067	23.897	Chr01	186902580
lg01	np1070	24.024	Chr01	189133895
lg01	np698	24.824	Chr01	48921287
lg01	np1069	25.169	Chr01	187198497
lg01	np700	25.474	Chr01	48947449
lg01	np699	25.877	Chr01	48921501
lg01	np710	27.508	Chr01	52568849
lg01	np712	27.508	Chr01	52568871
lg01	np709	27.66	Chr01	52568825
lg01	np716	28.233	Chr01	56388247
lg01	np1002	30.461	Chr01	161656021
lg01	np1052	31.02	Chr01	178280686
lg01	np974	31.474	Chr01	152310555
lg01	np1040	31.848	Chr01	167540309
lg01	np1041	32.31	Chr01	168749403
lg01	np1043	32.399	Chr01	169636629
lg01	np970	32.687	Chr01	150577777
lg01	np1046	33.021	Chr01	173429574
lg01	np725	33.3	Chr01	58605905
lg01	np726	33.39	Chr01	58605927
lg01	np721	33.446	Chr01	57162782
lg01	np727	33.518	Chr01	58606002
lg01	np1032	34.846	Chr01	164511523
lg01	np1038	34.85	Chr01	166619732
lg01	np1012	35.278	Chr01	162767367
lg01	np1024	35.363	Chr01	162767494
lg01	np1008	35.534	Chr01	162767324
lg01	np995	35.883	Chr01	160706998
lg01	np992	36.063	Chr01	159933492
lg01	np978	36.258	Chr01	153545122
lg01	np989	36.504	Chr01	157650150
lg01	np969	36.649	Chr01	150072831
lg01	np998	37.106	Chr01	161096863
lg01	np988	37.311	Chr01	157578063
lg01	np991	37.388	Chr01	158479752
lg01	np987	37.411	Chr01	157350968
lg01	np986	37.527	Chr01	157263586
lg01	np972	37.746	Chr01	151730942
lg01	np975	37.886	Chr01	153098759
lg01	np976	37.976	Chr01	153098777
lg01	np961	38.281	Chr01	146665766
lg01	np962	38.297	Chr01	146665780
lg01	np945	38.598	Chr01	137300301
lg01	np936	38.772	Chr01	132321258
lg01	np954	39.004	Chr01	141594364
lg01	np952	39.056	Chr01	141594342
lg01	np930	39.187	Chr01	129607428
lg01	np935	39.206	Chr01	131101988
lg01	np931	39.301	Chr01	129607472
lg01	np963	39.437	Chr01	147550444
lg01	np959	39.475	Chr01	142076447
lg01	np916	39.69	Chr01	125134922
lg01	np929	39.73	Chr01	129399018
lg01	np938	39.737	Chr01	133966418
lg01	np915	39.85	Chr01	124947995
lg01	np893	39.979	Chr01	113198663
lg01	np875	40.336	Chr01	109682362
lg01	np891	40.359	Chr01	112098778
lg01	np892	40.368	Chr01	112099013
lg01	np895	40.458	Chr01	114327799
lg01	np887	40.634	Chr01	111554728
lg01	np897	40.808	Chr01	114730099
lg01	np886	40.89	Chr01	111554727
lg01	np883	41.035	Chr01	111550502
lg01	np872	41.296	Chr01	108050751
lg01	np871	41.458	Chr01	108050635
lg01	np884	41.582	Chr01	111554640
lg01	np873	41.89	Chr01	108257839
lg01	np868	41.98	Chr01	106296094
lg01	np867	42.07	Chr01	106128295
lg01	np866	42.196	Chr01	105232792
lg01	np885	42.334	Chr01	111554711
lg01	np853	42.652	Chr01	98510044
lg01	np859	42.906	Chr01	103420997
lg01	np850	43.06	Chr01	96199246
lg01	np832	43.198	Chr01	83345868
lg01	np831	43.284	Chr01	83345711
lg01	np731	43.604	Chr01	60361903
lg01	np1124	43.969	Chr01	198378637
lg01	np1120	43.973	Chr01	198378574
lg01	np1122	43.973	Chr01	198378585
lg01	np1125	44.013	Chr01	198378656
lg01	np836	44.24	Chr01	86877327
lg01	np729	44.885	Chr01	60361848
lg01	np730	44.897	Chr01	60361856
lg01	np728	44.956	Chr01	60361829
lg01	np828	45.177	Chr01	82323990
lg01	np956	45.732	Chr01	141594432
lg01	np955	45.794	Chr01	141594383
lg01	np958	45.833	Chr01	141594491
lg01	np824	46.582	Chr01	80309593
lg01	np826	46.755	Chr01	81149163
lg01	np819	46.875	Chr01	79979287
lg01	np820	46.976	Chr01	80143335
lg01	np812	47.155	Chr01	78013983
lg01	np811	47.232	Chr01	78013905
lg01	np789	47.271	Chr01	72225880
lg01	np763	47.593	Chr01	68340592
lg01	np786	47.661	Chr01	71334173
lg01	np772	47.722	Chr01	70292329
lg01	np783	47.758	Chr01	70692694
lg01	np775	47.793	Chr01	70292372
lg01	np785	47.825	Chr01	71241088
lg01	np770	47.858	Chr01	70292277
lg01	np755	48.019	Chr01	65876252
lg01	np798	48.236	Chr01	75720135
lg01	np778	48.742	Chr01	70561743
lg01	np857	49.547	Chr01	103420855
lg01	np766	49.861	Chr01	68363991
lg01	np758	50.187	Chr01	67175892
lg01	np757	50.288	Chr01	66928514
lg01	np790	50.381	Chr01	72415144
lg01	np957	52.666	Chr01	141594442
lg01	np953	53.308	Chr01	141594344
lg01	np874	54.488	Chr01	109682327
lg01	np876	54.626	Chr01	109682366
lg01	np877	54.712	Chr01	109682411
lg01	np753	55.161	Chr01	64907340
lg01	np754	55.422	Chr01	64907347
lg01	np751	55.662	Chr01	64844664
lg01	np750	55.799	Chr01	64844649
lg01	np777	56.119	Chr01	70561694
lg01	np752	56.741	Chr01	64907194
lg01	np759	57.52	Chr01	67181090
lg01	np760	57.569	Chr01	67181136
lg01	np768	58.085	Chr01	68422502
lg01	np767	58.151	Chr01	68422303
lg01	np802	59.227	Chr01	76414940
lg01	np781	59.705	Chr01	70692692
lg01	np780	60.04	Chr01	70666706
lg01	np738	61.464	Chr01	62143209
lg01	np800	62.339	Chr01	75964921
lg01	np983	63.75	Chr01	155899201
lg01	np899	63.927	Chr01	116057133
lg01	np919	64.401	Chr01	126880482
lg01	np900	64.586	Chr01	116057198
lg01	np804	64.991	Chr01	76737623
lg01	np806	64.992	Chr01	76737654
lg01	np808	65.097	Chr01	76737693
lg01	np805	65.47	Chr01	76737641
lg01	np741	66.06	Chr01	62143259
lg01	np733	66.315	Chr01	61735960
lg01	np732	66.535	Chr01	60650246
lg01	np736	66.856	Chr01	62143199
lg01	np809	67.928	Chr01	76737735
lg01	np984	69.024	Chr01	155899202
lg01	np977	69.085	Chr01	153545115
lg01	np862	69.258	Chr01	104448810
lg01	np865	69.407	Chr01	104534140
lg01	np856	69.604	Chr01	101613250
lg01	np864	69.89	Chr01	104448914
lg01	np807	70.058	Chr01	76737687
lg01	np940	70.296	Chr01	135942285
lg01	np911	70.682	Chr01	122269144
lg01	np1037	70.862	Chr01	165833829
lg01	np927	71.051	Chr01	128340784
lg01	np1009	71.812	Chr01	162767343
lg01	np1018	71.85	Chr01	162767437
lg01	np1022	71.92	Chr01	162767469
lg01	np1005	71.939	Chr01	162767309
lg01	np1014	71.939	Chr01	162767380
lg01	np1007	72.003	Chr01	162767319
lg01	np1016	72.003	Chr01	162767397
lg01	np1011	72.01	Chr01	162767358
lg01	np1017	72.011	Chr01	162767418
lg01	np1021	72.011	Chr01	162767464
lg01	np1019	72.013	Chr01	162767442
lg01	np1023	72.022	Chr01	162767486
lg01	np1013	72.027	Chr01	162767368
lg01	np1010	72.029	Chr01	162767346
lg01	np1015	72.045	Chr01	162767385
lg01	np1006	72.061	Chr01	162767311
lg01	np1020	72.085	Chr01	162767443
lg01	np985	72.736	Chr01	155899238
lg01	np990	72.839	Chr01	157720837
lg01	np994	73.042	Chr01	160196455
lg01	np1025	73.148	Chr01	163675130
lg01	np999	73.214	Chr01	161096869
lg01	np1000	73.255	Chr01	161096907
lg01	np1001	73.423	Chr01	161257814
lg01	np1035	73.656	Chr01	165577786
lg01	np1034	73.745	Chr01	165565509
lg01	np1031	73.935	Chr01	164511306
lg01	np1003	74.25	Chr01	162467593
lg01	np1042	74.52	Chr01	169508170
lg01	np913	74.876	Chr01	122990022
lg01	np960	75.305	Chr01	146665730
lg01	np946	75.417	Chr01	138383921
lg01	np944	75.754	Chr01	136558444
lg01	np943	75.76	Chr01	136558432
lg01	np902	75.931	Chr01	116910044
lg01	np942	76.173	Chr01	136356620
lg01	np971	76.421	Chr01	150577851
lg01	np932	76.728	Chr01	129619691
lg01	np882	77.001	Chr01	111254808
lg01	np947	77.141	Chr01	138413672
lg01	np799	77.567	Chr01	75964890
lg01	np801	77.715	Chr01	75965082
lg01	np948	77.956	Chr01	138413902
lg01	np909	78.134	Chr01	121133211
lg01	np949	78.49	Chr01	138540756
lg01	np863	78.787	Chr01	104448878
lg01	np803	79.293	Chr01	76737588
lg01	np810	79.301	Chr01	76737777
lg01	np784	79.476	Chr01	71241024
lg01	np833	79.712	Chr01	83790982
lg01	np901	80.137	Chr01	116905732
lg01	np844	80.577	Chr01	89955087
lg01	np830	80.749	Chr01	83067574
lg01	np825	81.014	Chr01	81149034
lg01	np838	81.263	Chr01	88522427
lg01	np814	81.533	Chr01	78834330
lg01	np787	81.806	Chr01	71823436
lg01	np797	81.958	Chr01	74995692
lg01	np782	82.118	Chr01	70692693
lg01	np776	82.404	Chr01	70292390
lg01	np769	82.561	Chr01	70180366
lg01	np773	82.622	Chr01	70292344
lg01	np774	82.794	Chr01	70292358
lg01	np771	82.84	Chr01	70292289
lg01	np851	83.425	Chr01	97307777
lg01	np852	83.498	Chr01	97307793
lg01	np839	83.601	Chr01	88541282
lg01	np834	83.81	Chr01	85345067
lg01	np827	84.096	Chr01	81667123
lg01	np779	84.426	Chr01	70654167
lg01	np1053	84.996	Chr01	178280702
lg01	np1033	85.456	Chr01	164511549
lg02	np6374	0	Chr02	2551836
lg02	np6403	9.246	Chr02	15074387
lg02	np6407	10.949	Chr02	15197441
lg02	np6406	11.141	Chr02	15197426
lg02	np6400	11.498	Chr02	15074343
lg02	np6404	11.499	Chr02	15074393
lg02	np6405	11.539	Chr02	15074445
lg02	np6402	11.599	Chr02	15074383
lg02	np6401	12.315	Chr02	15074372
lg02	np6375	13.07	Chr02	2674396
lg02	np6382	13.336	Chr02	6425838
lg02	np6387	13.353	Chr02	9305574
lg02	np6383	13.441	Chr02	6425889
lg02	np6396	13.908	Chr02	13309463
lg02	np6397	14.034	Chr02	13343376
lg02	np6381	14.812	Chr02	5952252
lg02	np6380	14.987	Chr02	5531810
lg02	np6412	16.649	Chr02	17066281
lg02	np6393	18.067	Chr02	11248456
lg02	np6394	18.379	Chr02	12515464
lg02	np6391	18.626	Chr02	10416510
lg02	np6398	19.005	Chr02	13591878
lg02	np6399	19.862	Chr02	14529742
lg02	np6418	21.109	Chr02	20194732
lg02	np6430	21.302	Chr02	25611273
lg02	np6409	22.239	Chr02	16668933
lg02	np6426	23.24	Chr02	24586486
lg02	np6420	24.527	Chr02	21763301
lg02	np6448	26.338	Chr02	31864035
lg02	np6447	26.419	Chr02	31864034
lg02	np6480	27.718	Chr02	43665716
lg02	np6479	28.24	Chr02	41023787
lg02	np6468	28.993	Chr02	35631557
lg02	np6469	29.06	Chr02	35631654
lg02	np6472	29.463	Chr02	37544516
lg02	np6473	29.893	Chr02	37552101
lg02	np6445	30.339	Chr02	29958116
lg02	np6459	31.937	Chr02	34535073
lg02	np6461	32.094	Chr02	34535187
lg02	np6371	34.712	Chr02	2406763
lg02	np6476	35.864	Chr02	39770315
lg02	np6471	36.122	Chr02	36226228
lg02	np6470	36.26	Chr02	36226053
lg02	np6395	38.197	Chr02	13168828
lg02	np6437	38.937	Chr02	27135391
lg02	np6435	39.593	Chr02	27135282
lg02	np6436	40.377	Chr02	27135305
lg02	np6378	42.852	Chr02	3722624
lg02	np6386	43.924	Chr02	9131579
lg02	np6410	45.218	Chr02	17023585
lg02	np6423	46.515	Chr02	24586387
lg02	np6424	47.544	Chr02	24586458
lg02	np6425	47.814	Chr02	24586481
lg02	np6451	49.205	Chr02	32628739
lg02	np6434	50.408	Chr02	27135268
lg02	np6454	50.972	Chr02	32628861
lg02	np6433	51.879	Chr02	27135180
lg02	np6417	52.294	Chr02	19132894
lg02	np6421	53.73	Chr02	22386284
lg02	np6427	53.798	Chr02	24921013
lg02	np6428	54.055	Chr02	24921177
lg02	np6429	54.393	Chr02	25591444
lg02	np6455	55.118	Chr02	32628905
lg02	np6453	55.256	Chr02	32628829
lg02	np6452	55.267	Chr02	32628740
lg02	np6431	56.207	Chr02	25611279
lg02	np6432	57.041	Chr02	25611342
lg02	np6449	57.514	Chr02	31864223
lg02	np6446	58.07	Chr02	31323622
lg02	np6450	59.1	Chr02	32103695
lg02	np6444	59.195	Chr02	29915993
lg02	np6439	60.263	Chr02	28519051
lg02	np6440	60.367	Chr02	28519121
lg02	np6441	60.531	Chr02	28519211
lg02	np6442	60.618	Chr02	28519220
lg02	np6438	60.834	Chr02	28519020
lg02	np6467	61.951	Chr02	34793360
lg02	np6460	62.474	Chr02	34535118
lg02	np6463	62.672	Chr02	34535262
lg02	np6462	63.007	Chr02	34535203
lg02	np6416	63.548	Chr02	18861621
lg02	np6510	68.184	Chr02	52201086
lg02	np6512	68.759	Chr02	52455568
lg02	np6485	70.481	Chr02	45684353
lg02	np6496	71.42	Chr02	49197796
lg02	np6497	71.459	Chr02	49197819
lg02	np6490	72.133	Chr02	47542348
lg02	np6489	72.515	Chr02	47378694
lg02	np6488	73.021	Chr02	47082925
lg02	np6522	74.194	Chr02	54589930
lg02	np6509	74.969	Chr02	52201071
lg02	np6511	75.027	Chr02	52201265
lg02	np6551	76.584	Chr02	60215878
lg02	np6498	77.382	Chr02	49307192
lg02	np6499	77.608	Chr02	49307235
lg02	np6523	78.159	Chr02	54876900
lg02	np6524	78.505	Chr02	54876991
lg02	np6513	78.806	Chr02	52854875
lg02	np6521	79.469	Chr02	54458986
lg02	np6519	79.725	Chr02	54458940
lg02	np6520	79.742	Chr02	54458961
lg02	np6527	82.726	Chr02	56078183
lg02	np6526	83.077	Chr02	56077994
lg02	np6553	85.23	Chr02	63619493
lg02	np6552	85.232	Chr02	61018387
lg02	np6547	85.502	Chr02	59200151
lg02	np6555	86.165	Chr02	65775989
lg02	np6531	86.411	Chr02	58039645
lg02	np6559	88.485	Chr02	66771198
lg02	np6558	89.31	Chr02	66771147
lg02	np6557	89.375	Chr02	66771117
lg02	np6562	91.427	Chr02	67158954
lg02	np6567	92.132	Chr02	68309113
lg02	np6564	92.381	Chr02	67735050
lg02	np6578	92.598	Chr02	72744794
lg02	np6570	92.772	Chr02	70203141
lg02	np6563	92.846	Chr02	67734859
lg02	np6579	92.912	Chr02	76545834
lg02	np6566	92.962	Chr02	68146656
lg02	np6569	93.149	Chr02	69220808
lg02	np6560	93.29	Chr02	67088531
lg02	np6580	93.45	Chr02	77032348
lg02	np6574	93.484	Chr02	70750210
lg02	np6575	93.496	Chr02	70750218
lg02	np6576	93.721	Chr02	72015405
lg02	np6577	93.731	Chr02	72198131
lg02	np6561	94.047	Chr02	67088582
lg02	np6568	94.243	Chr02	68604418
lg02	np6583	94.507	Chr02	78459986
lg02	np6565	95.045	Chr02	68024986
lg02	np6808	95.401	Chr02	146345882
lg02	np6809	95.576	Chr02	146345909
lg02	np6595	96.537	Chr02	80725602
lg02	np6589	96.539	Chr02	80340549
lg02	np6588	96.744	Chr02	79405125
lg02	np6587	96.881	Chr02	79404998
lg02	np6593	97.594	Chr02	80688540
lg02	np6581	98.21	Chr02	77328461
lg02	np6572	98.862	Chr02	70233479
lg02	np6586	99.714	Chr02	79034370
lg02	np6556	100.648	Chr02	66771035
lg02	np6609	105.899	Chr02	85824253
lg02	np6610	106.282	Chr02	85824264
lg02	np6608	106.544	Chr02	85824231
lg02	np6613	108.643	Chr02	86292463
lg02	np6614	110.279	Chr02	87339501
lg02	np6633	113.737	Chr02	101506749
lg02	np6723	114.519	Chr02	119035073
lg02	np6635	115.36	Chr02	101506935
lg02	np6636	116.297	Chr02	104136420
lg02	np6726	117.14	Chr02	119205180
lg02	np6657	117.663	Chr02	106879002
lg02	np6654	117.674	Chr02	106878936
lg02	np6669	117.922	Chr02	108748690
lg02	np6673	118.44	Chr02	110022066
lg02	np6718	118.772	Chr02	118536197
lg02	np6684	118.931	Chr02	111816437
lg02	np6687	118.937	Chr02	111816568
lg02	np6746	119.117	Chr02	123013103
lg02	np6745	119.452	Chr02	123013075
lg02	np6744	119.528	Chr02	123013066
lg02	np6743	119.543	Chr02	123013054
lg02	np6747	119.543	Chr02	123013215
lg02	np6727	119.741	Chr02	120146261
lg02	np6690	120.017	Chr02	112441497
lg02	np6689	120.027	Chr02	112441488
lg02	np6691	120.043	Chr02	112441501
lg02	np6732	120.35	Chr02	120168511
lg02	np6739	120.603	Chr02	120168845
lg02	np6735	121.104	Chr02	120168559
lg02	np6734	121.117	Chr02	120168517
lg02	np6730	121.175	Chr02	120168339
lg02	np6731	121.804	Chr02	120168407
lg02	np6729	121.835	Chr02	120168325
lg02	np6751	122.557	Chr02	125916955
lg02	np6790	122.626	Chr02	132913120
lg02	np6750	122.793	Chr02	125916915
lg02	np6793	123.053	Chr02	133111290
lg02	np6792	123.068	Chr02	133111272
lg02	np6794	123.22	Chr02	133111291
lg02	np6795	123.384	Chr02	133111298
lg02	np6752	123.56	Chr02	125916976
lg02	np6773	124.154	Chr02	128049716
lg02	np6769	124.589	Chr02	127981276
lg02	np6785	125.096	Chr02	132372499
lg02	np6764	125.277	Chr02	127946798
lg02	np6822	126.187	Chr02	150299450
lg02	np6805	126.446	Chr02	143724706
lg02	np6754	127.044	Chr02	126844577
lg02	np6722	127.881	Chr02	119035046
lg02	np6725	127.97	Chr02	119035178
lg02	np6825	129.191	Chr02	152629316
lg02	np6844	130.645	Chr02	168342745
lg02	np6843	130.694	Chr02	168342728
lg02	np6845	130.774	Chr02	168342916
lg02	np6846	131.094	Chr02	168905686
lg02	np6863	131.663	Chr02	183452041
lg02	np6870	132.014	Chr02	188198192
lg02	np6864	132.341	Chr02	183452166
lg02	np6761	134.35	Chr02	127918644
lg02	np6762	134.571	Chr02	127918645
lg03	lm252	0	Chr03	174833957
lg03	lm242	6.262	Chr03	167956713
lg03	np397	6.896	Chr03	160938797
lg03	lm228	10.214	Chr03	161049312
lg03	lm186	11.765	Chr03	160769468
lg03	np409	12.345	Chr03	160953776
lg03	np410	12.753	Chr03	160953895
lg03	np408	13.435	Chr03	160953770
lg03	lm188	15.007	Chr03	160817293
lg03	lm232	16.333	Chr03	161378971
lg03	lm194	17.121	Chr03	160825716
lg03	lm306	18.166	Chr03	211485973
lg03	lm219	20.041	Chr03	160931917
lg03	lm211	23.515	Chr03	160843387
lg03	lm199	25.689	Chr03	160825825
lg03	lm195	25.818	Chr03	160825732
lg03	lm193	25.893	Chr03	160825712
lg03	np498	28.962	Chr03	191887861
lg03	lm209	30.572	Chr03	160843346
lg03	lm210	30.572	Chr03	160843375
lg03	lm208	31.071	Chr03	160843302
lg03	lm192	37.709	Chr03	160822189
lg03	lm189	38.046	Chr03	160822069
lg03	np470	38.14	Chr03	172960478
lg03	lm190	38.534	Chr03	160822073
lg03	lm136	43.139	Chr03	124287124
lg03	np361	44.313	Chr03	160742487
lg03	np359	44.752	Chr03	160742370
lg03	np360	45.201	Chr03	160742464
lg03	np557	45.668	Chr03	211485194
lg03	hk115	46.254	Chr03	147754189
lg03	np416	47.326	Chr03	160974248
lg03	np562	47.663	Chr03	211486029
lg03	np563	47.861	Chr03	211486061
lg03	np556	48.172	Chr03	211477752
lg03	np430	48.496	Chr03	161414164
lg03	np561	48.688	Chr03	211485988
lg03	lm162	50.666	Chr03	150328805
lg03	np324	50.794	Chr03	155843098
lg03	np269	54.678	Chr03	124287178
lg03	np266	54.851	Chr03	124287054
lg03	np268	54.915	Chr03	124287167
lg03	hk113	55.728	Chr03	143953785
lg03	lm152	56.268	Chr03	130522560
lg03	np312	56.321	Chr03	146172930
lg03	np313	56.411	Chr03	146396169
lg03	np237	59.243	Chr03	106628311
lg03	np242	59.735	Chr03	107533240
lg03	np240	60.008	Chr03	106787232
lg03	np258	60.203	Chr03	117844087
lg03	np249	60.434	Chr03	109974242
lg03	np256	60.695	Chr03	116835509
lg03	np245	60.705	Chr03	107611743
lg03	np250	60.718	Chr03	115795681
lg03	np284	60.73	Chr03	129275316
lg03	np251	60.917	Chr03	115795727
lg03	np283	60.918	Chr03	129275313
lg03	np281	60.924	Chr03	129275219
lg03	np282	60.976	Chr03	129275275
lg03	np304	60.976	Chr03	136463356
lg03	np279	61.221	Chr03	128910312
lg03	np308	61.227	Chr03	136577760
lg03	np221	62.462	Chr03	101115207
lg03	np220	62.463	Chr03	101115204
lg03	np222	62.483	Chr03	101115218
lg03	lm113	62.911	Chr03	91362411
lg03	np227	62.929	Chr03	101381684
lg03	np226	63.238	Chr03	101373055
lg03	hk97	63.85	Chr03	93713526
lg03	np539	64.066	Chr03	207471800
lg03	np216	64.259	Chr03	98849728
lg03	np215	64.449	Chr03	98570865
lg03	lm121	64.475	Chr03	104161633
lg03	np211	64.786	Chr03	97759125
lg03	np195	65.549	Chr03	89710998
lg03	np190	65.818	Chr03	83600124
lg03	np161	67.205	Chr03	79930788
lg03	hk77	69.221	Chr03	78922669
lg03	hk79	69.253	Chr03	78922842
lg03	hk78	69.466	Chr03	78922696
lg03	lm109	69.737	Chr03	87434590
lg03	np265	69.86	Chr03	120698451
lg03	np533	71.176	Chr03	206550277
lg03	lm105	71.944	Chr03	81408491
lg03	np191	72.046	Chr03	88661105
lg03	np177	74.564	Chr03	82819636
lg03	np119	78.834	Chr03	59110439
lg03	lm76	79.071	Chr03	66133605
lg03	lm74	82.421	Chr03	63510733
lg03	np94	83.29	Chr03	42293743
lg03	lm75	83.752	Chr03	63510851
lg03	hk48	88.065	Chr03	50073680
lg03	np41	94.338	Chr03	18021055
lg03	np311	96.18	Chr03	143953573
lg03	np48	96.877	Chr03	22959426
lg03	np61	96.901	Chr03	23680064
lg03	np50	96.919	Chr03	22959527
lg03	np47	96.933	Chr03	22959310
lg03	np62	96.966	Chr03	23680091
lg03	lm51	97.624	Chr03	33656918
lg03	np59	97.671	Chr03	23679916
lg03	hk19	97.703	Chr03	23594121
lg03	lm55	98.419	Chr03	35592195
lg03	np65	98.507	Chr03	23789835
lg03	np38	99.997	Chr03	17508700
lg03	hk30	102.601	Chr03	33842706
lg03	hk29	102.618	Chr03	33842578
lg03	hk31	102.719	Chr03	33842721
lg03	lm50	103.654	Chr03	33656910
lg03	hk26	104.812	Chr03	31837361
lg03	hk25	105.052	Chr03	31837359
lg03	np31	106.202	Chr03	14627932
lg03	lm43	106.274	Chr03	28403691
lg03	lm11	107.1	Chr03	13195304
lg03	lm57	111.875	Chr03	38764453
lg03	lm56	113.309	Chr03	36880607
lg03	np70	114.638	Chr03	26118479
lg03	hk23	120.097	Chr03	30283720
lg03	np79	124.596	Chr03	32030660
lg03	hk21	127.322	Chr03	24451283
lg03	np80	127.784	Chr03	32295919
lg03	np92	130.815	Chr03	41339718
lg03	np315	137.049	Chr03	147965588
lg04	np1405	0	Chr04	65787025
lg04	np1395	0.972	Chr04	61400753
lg04	np1407	2.405	Chr04	65787128
lg04	np1406	2.65	Chr04	65787034
lg04	np1404	5.842	Chr04	65653634
lg04	np1394	8.401	Chr04	61400749
lg04	np1574	9.931	Chr04	104804931
lg04	np1419	10.723	Chr04	66431600
lg04	np1408	11.593	Chr04	65788473
lg04	np1412	12.009	Chr04	65937084
lg04	np1415	12.672	Chr04	66431523
lg04	np1411	13.225	Chr04	65788659
lg04	np1420	13.349	Chr04	66431632
lg04	np1402	14.206	Chr04	64723061
lg04	np1467	14.491	Chr04	78375312
lg04	np1458	14.954	Chr04	78022991
lg04	np1401	15.413	Chr04	64723030
lg04	np1416	15.94	Chr04	66431551
lg04	np1417	16.005	Chr04	66431563
lg04	np1399	16.248	Chr04	63822193
lg04	np1418	16.487	Chr04	66431569
lg04	np1413	16.54	Chr04	66431486
lg04	np1414	16.685	Chr04	66431518
lg04	np1422	17.247	Chr04	69449075
lg04	np1296	17.605	Chr04	8248263
lg04	np1436	18.488	Chr04	71489878
lg04	np1435	18.518	Chr04	71489872
lg04	np1442	18.77	Chr04	71754168
lg04	np1473	19.195	Chr04	79627985
lg04	np1393	19.462	Chr04	61360197
lg04	np1449	19.704	Chr04	72981799
lg04	np1483	19.982	Chr04	80011095
lg04	np1396	20.216	Chr04	62872066
lg04	np1495	20.479	Chr04	82850034
lg04	np1429	20.593	Chr04	69470270
lg04	np1448	20.837	Chr04	72908813
lg04	np1447	20.875	Chr04	72908812
lg04	np1446	20.889	Chr04	72823351
lg04	np1470	21.119	Chr04	79077454
lg04	np1431	21.266	Chr04	70280281
lg04	np1432	21.276	Chr04	70280315
lg04	np1452	21.407	Chr04	75442870
lg04	np1481	21.573	Chr04	79889028
lg04	np1480	21.682	Chr04	79888867
lg04	np1479	21.806	Chr04	79874117
lg04	np1478	21.884	Chr04	79873988
lg04	np1457	22.068	Chr04	77221861
lg04	np1484	22.208	Chr04	80016575
lg04	np1441	22.213	Chr04	71754163
lg04	np1444	22.275	Chr04	71754202
lg04	np1488	22.44	Chr04	80104419
lg04	np1486	22.469	Chr04	80104230
lg04	np1487	22.484	Chr04	80104341
lg04	np1430	22.676	Chr04	70014379
lg04	np1460	22.752	Chr04	78023038
lg04	np1472	22.902	Chr04	79485306
lg04	np1454	22.973	Chr04	76309499
lg04	np1496	23.12	Chr04	83250536
lg04	np1494	23.172	Chr04	82718028
lg04	np1469	23.351	Chr04	79063998
lg04	np1493	23.428	Chr04	82718026
lg04	np1491	23.705	Chr04	82344903
lg04	np1468	23.904	Chr04	78883464
lg04	np1502	24.359	Chr04	85348036
lg04	np1506	24.573	Chr04	86601643
lg04	np1505	24.722	Chr04	86601590
lg04	np1507	24.957	Chr04	86988322
lg04	np1525	25.39	Chr04	92651466
lg04	np1564	25.71	Chr04	103150296
lg04	np1563	25.844	Chr04	103150270
lg04	np1539	25.953	Chr04	96953634
lg04	np1517	26.055	Chr04	92204758
lg04	np1509	26.205	Chr04	88837331
lg04	np1565	26.448	Chr04	103150424
lg04	np1508	26.601	Chr04	87879151
lg04	np1557	26.62	Chr04	102001321
lg04	np1558	26.62	Chr04	102125696
lg04	np1562	27.027	Chr04	102519224
lg04	np1559	27.047	Chr04	102476632
lg04	np1561	27.047	Chr04	102476703
lg04	np1566	27.515	Chr04	103342575
lg04	np1657	27.869	Chr04	135009376
lg04	np1570	28.093	Chr04	103759042
lg04	np1541	28.332	Chr04	97568648
lg04	np1511	28.752	Chr04	92067211
lg04	np1560	29.233	Chr04	102476647
lg04	np1576	30.429	Chr04	107237698
lg04	np1585	30.868	Chr04	110768324
lg04	np1597	31.365	Chr04	111422889
lg04	np1593	31.552	Chr04	111402640
lg04	np1591	31.561	Chr04	111402599
lg04	np1580	31.796	Chr04	109832954
lg04	np1578	31.896	Chr04	109832907
lg04	np1588	32.169	Chr04	111402558
lg04	np1586	32.209	Chr04	111402540
lg04	np1582	32.211	Chr04	110237980
lg04	np1581	32.307	Chr04	110237879
lg04	np1598	32.374	Chr04	111422890
lg04	np1584	32.658	Chr04	110387069
lg04	np1577	33.176	Chr04	108961864
lg04	np1592	33.687	Chr04	111402615
lg04	np1605	34.634	Chr04	115645250
lg04	np1604	35.349	Chr04	115641469
lg04	np1609	38.173	Chr04	116920338
lg04	np1613	39.186	Chr04	119508183
lg04	np1612	39.604	Chr04	119368614
lg04	np1611	39.65	Chr04	119368586
lg04	np1615	40.494	Chr04	121181854
lg04	np1662	40.836	Chr04	135584368
lg04	np1658	41.154	Chr04	135009438
lg04	np1656	41.517	Chr04	134421223
lg04	np1659	41.718	Chr04	135548238
lg04	np1673	41.866	Chr04	136707697
lg04	np1674	41.903	Chr04	136707729
lg04	np1655	42.144	Chr04	134203727
lg04	np1626	42.243	Chr04	123697004
lg04	np1644	42.271	Chr04	131974069
lg04	np1639	42.388	Chr04	130525700
lg04	np1635	42.631	Chr04	127025516
lg04	np1645	42.636	Chr04	131974077
lg04	np1652	42.691	Chr04	133257229
lg04	np1642	42.805	Chr04	131448890
lg04	np1651	42.89	Chr04	133257121
lg04	np1624	43.027	Chr04	123556600
lg04	np1649	43.232	Chr04	133230551
lg04	np1650	43.296	Chr04	133230643
lg04	np1671	43.493	Chr04	136480529
lg04	np1638	43.625	Chr04	128295384
lg04	np1632	43.854	Chr04	125243582
lg04	np1665	43.986	Chr04	136257352
lg04	np1677	44.32	Chr04	138510365
lg04	np1678	44.593	Chr04	139191333
lg04	np1679	44.638	Chr04	139191338
lg04	np1667	45.063	Chr04	136257462
lg04	np1669	45.472	Chr04	136257516
lg04	np1666	45.703	Chr04	136257386
lg04	np1643	45.975	Chr04	131448897
lg04	np1641	46.037	Chr04	131448870
lg04	np1668	46.484	Chr04	136257511
lg04	np1680	47.101	Chr04	141242122
lg04	np1672	47.578	Chr04	136480550
lg04	np1704	49.032	Chr04	148323585
lg04	np1682	49.412	Chr04	141695322
lg04	np1684	49.526	Chr04	141718525
lg04	np1695	49.72	Chr04	142273972
lg04	np1690	49.851	Chr04	142219585
lg04	np1691	49.97	Chr04	142219587
lg04	np1693	49.984	Chr04	142219615
lg04	np1705	50.302	Chr04	148581005
lg04	np1683	50.46	Chr04	141718379
lg04	np1685	50.632	Chr04	141718568
lg04	np1686	50.667	Chr04	141718570
lg04	np1709	51.27	Chr04	148834117
lg04	np1708	51.393	Chr04	148834032
lg04	np1703	51.878	Chr04	147882011
lg04	np1700	52.125	Chr04	147119551
lg04	np1707	52.543	Chr04	148820957
lg04	np1706	52.978	Chr04	148820950
lg04	np1710	53.372	Chr04	149354341
lg04	np1718	53.938	Chr04	151142152
lg04	np1670	54.951	Chr04	136480497
lg04	np1721	58.516	Chr04	155805317
lg04	np1720	59.799	Chr04	155495164
lg04	np1732	62.361	Chr04	164921626
lg04	np1737	62.471	Chr04	167446697
lg04	np1799	63.301	Chr04	175241520
lg04	np1749	64.049	Chr04	168232577
lg04	np1748	64.057	Chr04	168232551
lg04	np1750	64.482	Chr04	168234663
lg04	np1751	64.893	Chr04	168234873
lg04	np1723	65.077	Chr04	162748367
lg04	np1753	65.38	Chr04	168311125
lg04	np1752	65.491	Chr04	168311107
lg04	np1726	65.628	Chr04	164895951
lg04	np1768	65.838	Chr04	173391617
lg04	np1736	66.198	Chr04	167446629
lg04	np1811	66.925	Chr04	175677256
lg04	np1809	67.001	Chr04	175677236
lg04	np1771	67.509	Chr04	173693800
lg04	np1806	67.858	Chr04	175677083
lg04	np1807	67.892	Chr04	175677123
lg04	np1808	67.968	Chr04	175677157
lg04	np1805	68.152	Chr04	175677082
lg04	np1778	68.93	Chr04	174954839
lg04	np1818	69.656	Chr04	176050882
lg04	np1817	69.902	Chr04	176050878
lg04	np1769	70.093	Chr04	173398382
lg04	np1816	70.21	Chr04	176050844
lg04	np1779	70.589	Chr04	174967762
lg04	np1792	70.724	Chr04	175200217
lg04	np1796	70.73	Chr04	175200419
lg04	np1776	70.773	Chr04	174954729
lg04	np1791	70.785	Chr04	175200202
lg04	np1815	70.941	Chr04	176050798
lg04	np1761	71.281	Chr04	171331524
lg04	np1819	71.464	Chr04	176065472
lg04	np1821	71.835	Chr04	176110557
lg04	np1804	72.158	Chr04	175674832
lg04	np1827	72.417	Chr04	180629648
lg04	np1814	72.747	Chr04	175965609
lg04	np1825	72.929	Chr04	176188398
lg04	np1822	73.398	Chr04	176110586
lg04	np1810	73.961	Chr04	175677238
lg04	np1841	74.868	Chr04	187014662
lg04	np1839	74.942	Chr04	185768352
lg04	np1845	75.297	Chr04	188533157
lg04	np1842	75.301	Chr04	188533067
lg04	np1847	75.313	Chr04	188533230
lg04	np1844	75.325	Chr04	188533143
lg04	np1848	75.379	Chr04	188533262
lg04	np1843	75.53	Chr04	188533127
lg04	np1846	75.643	Chr04	188533162
lg04	np1849	76.167	Chr04	188731962
lg04	np1850	76.172	Chr04	188732039
lg04	np1851	76.34	Chr04	189016567
lg04	np1855	76.745	Chr04	192160177
lg04	np1857	76.763	Chr04	192167080
lg04	np1858	76.766	Chr04	192167100
lg04	np1853	77.248	Chr04	190339777
lg04	np1813	78.008	Chr04	175965233
lg04	np1854	78.348	Chr04	192020569
lg04	np1823	78.962	Chr04	176133683
lg04	np1820	79.571	Chr04	176088724
lg04	np1861	80.552	Chr04	192741586
lg04	np1890	82.695	Chr04	202497969
lg04	np1895	82.936	Chr04	203969255
lg04	np1894	83.114	Chr04	203580499
lg04	np1876	83.545	Chr04	199812078
lg04	np1877	83.576	Chr04	199812093
lg04	np1875	83.584	Chr04	199812065
lg04	np1891	83.981	Chr04	202598886
lg04	np1886	84.151	Chr04	201199877
lg04	np1874	84.377	Chr04	197707931
lg04	np1897	84.557	Chr04	205063096
lg04	np1885	84.886	Chr04	200671427
lg04	np1880	85.225	Chr04	200083232
lg04	np1881	85.328	Chr04	200083266
lg04	np1883	85.371	Chr04	200083297
lg04	np1882	85.377	Chr04	200083284
lg04	np1873	85.744	Chr04	197707906
lg04	np1889	86.134	Chr04	202381583
lg04	np1884	86.449	Chr04	200083347
lg04	np1878	87.197	Chr04	199848086
lg04	np1903	87.989	Chr04	206078496
lg04	np1935	88.339	Chr04	219918171
lg04	np1929	88.772	Chr04	217445227
lg04	np1888	89.533	Chr04	202381481
lg04	np1872	90.393	Chr04	197693703
lg04	np1907	91.456	Chr04	207935481
lg04	np1930	91.868	Chr04	218366692
lg04	np1879	93.314	Chr04	200083197
lg04	np1905	94.423	Chr04	207935396
lg04	np1933	94.836	Chr04	219859392
lg04	np1871	96.241	Chr04	197693680
lg04	np1763	98.56	Chr04	171492588
lg04	np1754	102.477	Chr04	168424510
lg04	np1722	104.112	Chr04	158455125
lg04	np1738	110.156	Chr04	167492611
lg05	np2291	0	Chr05	215522472
lg05	np2228	5.761	Chr05	186135536
lg05	np2227	6.213	Chr05	186135404
lg05	np2266	8.139	Chr05	205777018
lg05	np2290	8.825	Chr05	214397201
lg05	np2289	9.664	Chr05	214244175
lg05	np2286	9.797	Chr05	210896752
lg05	np2285	10.737	Chr05	210854651
lg05	np2279	12.704	Chr05	207472217
lg05	np2283	14.394	Chr05	208050334
lg05	np2280	14.45	Chr05	207577986
lg05	np2243	15.579	Chr05	202655737
lg05	np2273	18.1	Chr05	205926868
lg05	np2274	18.116	Chr05	205926872
lg05	np2271	18.173	Chr05	205926849
lg05	np2269	18.219	Chr05	205926782
lg05	np2267	18.227	Chr05	205926730
lg05	np2242	20.055	Chr05	202563488
lg05	np2231	21.374	Chr05	197977864
lg05	np2253	24.276	Chr05	205110281
lg05	lm845	27.142	Chr05	7797433
lg05	np2275	27.45	Chr05	205926885
lg05	np2270	27.777	Chr05	205926835
lg05	np2268	28.021	Chr05	205926776
lg05	lm844	28.078	Chr05	6599572
lg05	np2213	28.274	Chr05	171435830
lg05	lm843	28.474	Chr05	6599550
lg05	lm859	31.116	Chr05	16896420
lg05	lm861	33.276	Chr05	16906988
lg05	lm858	33.557	Chr05	16873418
lg05	np2222	34.959	Chr05	180508981
lg05	lm846	35.115	Chr05	9209479
lg05	np2206	36.084	Chr05	162012890
lg05	lm856	36.107	Chr05	15710247
lg05	lm857	37.155	Chr05	15710253
lg05	lm863	37.325	Chr05	18785031
lg05	lm864	37.531	Chr05	18785191
lg05	np2190	38.565	Chr05	154682948
lg05	np2288	38.893	Chr05	213701736
lg05	np2287	39.093	Chr05	211038176
lg05	np2154	39.442	Chr05	147900157
lg05	np2262	41.216	Chr05	205331029
lg05	np2254	41.48	Chr05	205330854
lg05	np2258	41.596	Chr05	205330929
lg05	np2260	41.718	Chr05	205330980
lg05	np2261	41.72	Chr05	205330989
lg05	lm868	41.845	Chr05	27717973
lg05	np2282	41.961	Chr05	207911510
lg05	lm866	42.281	Chr05	27717942
lg05	np2247	42.299	Chr05	202956444
lg05	np2248	42.339	Chr05	202956524
lg05	lm867	42.384	Chr05	27717953
lg05	np2241	42.686	Chr05	202469063
lg05	np2119	43.704	Chr05	140029453
lg05	np2252	44.334	Chr05	205075452
lg05	np2278	44.484	Chr05	207442703
lg05	np2292	44.993	Chr05	216601353
lg05	np2294	45.043	Chr05	216601477
lg05	np2295	45.144	Chr05	216601479
lg05	np2293	45.233	Chr05	216601401
lg05	np2281	45.986	Chr05	207578039
lg05	np2223	47.924	Chr05	180702065
lg05	np2234	48.542	Chr05	200247997
lg05	hk646	50.478	Chr05	149611559
lg05	lm883	50.812	Chr05	43943688
lg05	np2162	51.216	Chr05	151350410
lg05	lm884	51.527	Chr05	43943726
lg05	lm881	51.933	Chr05	42895076
lg05	np1946	52.107	Chr05	4233974
lg05	lm882	52.232	Chr05	42895129
lg05	np1944	52.541	Chr05	4233816
lg05	lm887	53.164	Chr05	44647103
lg05	np2181	53.519	Chr05	154013621
lg05	np2184	54.208	Chr05	154014940
lg05	lm885	54.827	Chr05	44349825
lg05	np2186	54.844	Chr05	154014992
lg05	np2182	55.485	Chr05	154014059
lg05	np2183	55.964	Chr05	154014918
lg05	np2192	56.291	Chr05	155226390
lg05	np2217	56.539	Chr05	176463516
lg05	np2163	57.101	Chr05	151350435
lg05	lm890	57.484	Chr05	48076708
lg05	np2193	57.651	Chr05	155226437
lg05	lm889	57.869	Chr05	47679743
lg05	np2128	58.113	Chr05	142469288
lg05	hk631	58.343	Chr05	130696857
lg05	lm901	58.815	Chr05	74689474
lg05	np2168	58.949	Chr05	153842971
lg05	hk647	59.206	Chr05	154551649
lg05	np2215	59.539	Chr05	171696632
lg05	np2169	59.779	Chr05	153843011
lg05	np2175	60.077	Chr05	153988306
lg05	np2174	60.091	Chr05	153988288
lg05	np2170	60.324	Chr05	153843051
lg05	np2172	60.483	Chr05	153886612
lg05	np2230	60.627	Chr05	191843199
lg05	np2167	60.998	Chr05	153842954
lg05	lm921	61.117	Chr05	91300895
lg05	np2176	61.342	Chr05	154004368
lg05	np2177	61.507	Chr05	154004417
lg05	hk638	61.662	Chr05	143964880
lg05	np2173	61.918	Chr05	153988227
lg05	lm926	62.142	Chr05	102157660
lg05	np2189	62.257	Chr05	154578023
lg05	np2178	62.441	Chr05	154004436
lg05	np2196	62.929	Chr05	156580197
lg05	np2197	63.096	Chr05	156580253
lg05	np2198	63.145	Chr05	156580261
lg05	lm902	63.359	Chr05	75672219
lg05	np2161	63.497	Chr05	151350373
lg05	np2212	63.668	Chr05	171297820
lg05	np2214	63.971	Chr05	171635755
lg05	np2160	64.2	Chr05	151292484
lg05	np2171	64.345	Chr05	153843066
lg05	lm909	64.454	Chr05	76676698
lg05	np2166	64.461	Chr05	153330964
lg05	hk624	64.779	Chr05	125026078
lg05	np2144	65.103	Chr05	147880259
lg05	np2204	65.254	Chr05	158587776
lg05	hk637	65.276	Chr05	143937146
lg05	np2216	65.335	Chr05	173032310
lg05	np2127	65.502	Chr05	141879678
lg05	hk639	65.595	Chr05	144353822
lg05	np2156	65.647	Chr05	148119981
lg05	np2152	65.957	Chr05	147900119
lg05	np2153	65.967	Chr05	147900138
lg05	np2199	66.104	Chr05	157033470
lg05	lm910	66.138	Chr05	78780129
lg05	np2201	66.217	Chr05	157647838
lg05	np2200	66.312	Chr05	157559443
lg05	np2187	66.414	Chr05	154017587
lg05	np2195	66.56	Chr05	156043241
lg05	np2158	66.77	Chr05	150493026
lg05	np2157	66.776	Chr05	150492998
lg05	np2159	66.782	Chr05	150493053
lg05	np2155	67.068	Chr05	147900161
lg05	np2143	67.172	Chr05	147842947
lg05	lm916	67.18	Chr05	84645459
lg05	np2129	67.316	Chr05	143603474
lg05	np2130	67.327	Chr05	143603536
lg05	np2136	67.572	Chr05	147558653
lg05	np2137	67.673	Chr05	147586969
lg05	np2138	67.674	Chr05	147587100
lg05	np2147	67.741	Chr05	147880284
lg05	np2151	68.169	Chr05	147880407
lg05	np2146	68.175	Chr05	147880267
lg05	np2149	68.183	Chr05	147880311
lg05	np2145	68.213	Chr05	147880265
lg05	np2148	68.217	Chr05	147880290
lg05	lm913	68.22	Chr05	80959429
lg05	np2150	68.234	Chr05	147880319
lg05	np2133	68.377	Chr05	146994949
lg05	np2135	68.404	Chr05	146994991
lg05	np2142	68.737	Chr05	147678982
lg05	hk623	68.963	Chr05	125018268
lg05	np2139	69.346	Chr05	147602356
lg05	np2140	69.356	Chr05	147602359
lg05	lm924	69.469	Chr05	93584591
lg05	np2141	69.497	Chr05	147602492
lg05	np2134	69.628	Chr05	146994963
lg05	np2115	69.983	Chr05	140029223
lg05	lm925	70.105	Chr05	102157515
lg05	lm990	70.228	Chr05	123861919
lg05	np2114	70.453	Chr05	139857463
lg05	np2105	70.595	Chr05	131303939
lg05	lm989	70.811	Chr05	123861898
lg05	np2100	71.278	Chr05	130778687
lg05	np2106	71.398	Chr05	131303955
lg05	np2112	71.54	Chr05	135794744
lg05	np2110	71.813	Chr05	135455716
lg05	np2109	71.962	Chr05	135454778
lg05	lm988	72.088	Chr05	123861888
lg05	hk630	72.25	Chr05	130696758
lg05	np2076	72.731	Chr05	123861892
lg05	np2081	72.904	Chr05	123862020
lg05	lm1001	73.024	Chr05	128576771
lg05	lm1000	73.198	Chr05	128384032
lg05	np2079	73.226	Chr05	123861987
lg05	lm953	73.845	Chr05	108162552
lg05	np2098	73.856	Chr05	127392704
lg05	lm954	73.918	Chr05	108162587
lg05	np2069	74.029	Chr05	122902836
lg05	np2051	74.139	Chr05	116235139
lg05	np2046	74.144	Chr05	110650094
lg05	np2075	74.266	Chr05	123726069
lg05	np2074	74.401	Chr05	123126711
lg05	lm995	74.63	Chr05	126060171
lg05	np2055	74.679	Chr05	117741836
lg05	np2056	74.729	Chr05	117741856
lg05	np2070	74.876	Chr05	122902841
lg05	np2072	74.916	Chr05	122902938
lg05	np2071	74.941	Chr05	122902932
lg05	lm947	75.065	Chr05	105844867
lg05	np2057	75.225	Chr05	118674548
lg05	np2050	75.36	Chr05	115329882
lg05	lm952	75.494	Chr05	107182322
lg05	np2067	75.529	Chr05	122460256
lg05	np2048	75.56	Chr05	111184479
lg05	lm968	75.608	Chr05	118620051
lg05	np2062	75.656	Chr05	120243006
lg05	lm967	75.812	Chr05	118546637
lg05	np2066	75.852	Chr05	122460220
lg05	np2033	75.921	Chr05	104337380
lg05	lm963	75.956	Chr05	116873257
lg05	hk618	76.125	Chr05	111543868
lg05	lm987	76.21	Chr05	123568886
lg05	np2065	76.234	Chr05	122460130
lg05	lm957	76.452	Chr05	108350850
lg05	lm955	76.487	Chr05	108350817
lg05	np2068	76.635	Chr05	122460268
lg05	np2036	76.813	Chr05	106732094
lg05	np2039	76.866	Chr05	108350721
lg05	lm965	76.977	Chr05	118496432
lg05	np2038	77.045	Chr05	108350658
lg05	np2040	77.236	Chr05	108350726
lg05	lm994	77.269	Chr05	125521881
lg05	np2041	77.39	Chr05	108661572
lg05	lm993	77.572	Chr05	125521833
lg05	hk613	77.816	Chr05	107461156
lg05	np2054	78.024	Chr05	116805982
lg05	lm996	78.129	Chr05	126060239
lg05	np2086	78.407	Chr05	125521857
lg05	np2084	78.564	Chr05	125521813
lg05	np2085	78.783	Chr05	125521854
lg05	lm981	78.922	Chr05	123032933
lg05	np2099	78.923	Chr05	128686129
lg05	lm982	79.254	Chr05	123032961
lg05	np2064	79.349	Chr05	122443132
lg05	lm986	79.643	Chr05	123397342
lg05	np2080	79.772	Chr05	123862015
lg05	np2063	80.138	Chr05	120595454
lg05	lm966	80.522	Chr05	118546614
lg05	np2042	80.65	Chr05	108741530
lg05	np2061	80.911	Chr05	119530950
lg05	lm964	81.008	Chr05	118496303
lg05	hk629	81.259	Chr05	127920809
lg05	lm976	81.514	Chr05	122662715
lg05	lm979	81.6	Chr05	122902951
lg05	lm980	81.634	Chr05	122903014
lg05	np2032	81.675	Chr05	103779048
lg05	hk609	82.074	Chr05	94895827
lg05	np2021	82.276	Chr05	88841942
lg05	lm985	82.531	Chr05	123240057
lg05	lm1002	82.9	Chr05	128618703
lg05	hk628	83.354	Chr05	126060319
lg05	np2089	83.6	Chr05	126060282
lg05	np2090	83.856	Chr05	126060301
lg05	np2091	83.88	Chr05	126060370
lg05	lm991	84.003	Chr05	123861929
lg05	np2060	84.656	Chr05	119530941
lg05	np2088	84.902	Chr05	126060260
lg05	np2104	85.176	Chr05	130885271
lg05	hk603	85.322	Chr05	80046191
lg05	hk604	85.324	Chr05	80046256
lg05	np2030	85.588	Chr05	94880879
lg05	hk599	86.099	Chr05	76639458
lg05	np2078	86.222	Chr05	123861922
lg05	np2077	86.481	Chr05	123861916
lg05	hk600	86.934	Chr05	76639492
lg05	np2087	87.35	Chr05	126060217
lg05	np2022	87.832	Chr05	89402062
lg05	np2024	88.215	Chr05	90027660
lg05	hk619	88.461	Chr05	114707976
lg05	lm997	88.611	Chr05	126060283
lg05	hk606	88.853	Chr05	92223181
lg05	np2026	89.084	Chr05	90027727
lg05	np2000	89.693	Chr05	63908135
lg05	lm962	89.822	Chr05	116619923
lg05	np2002	89.868	Chr05	69872601
lg05	np2025	90.278	Chr05	90027662
lg05	hk607	90.572	Chr05	92223339
lg05	lm975	91.526	Chr05	122460299
lg05	np2020	91.658	Chr05	86748929
lg05	np2019	91.726	Chr05	86748913
lg05	lm972	92.177	Chr05	119530967
lg05	np2108	92.283	Chr05	135287000
lg05	lm971	92.574	Chr05	119530909
lg05	lm970	92.69	Chr05	119530849
lg05	lm973	92.979	Chr05	119531042
lg05	np1998	93.482	Chr05	62025377
lg05	np1997	93.764	Chr05	62025246
lg05	np1996	93.902	Chr05	62025194
lg05	np2005	94.626	Chr05	72450274
lg05	np2027	95.081	Chr05	90027733
lg05	lm931	95.796	Chr05	104337429
lg05	lm933	95.809	Chr05	104337512
lg05	lm928	95.871	Chr05	104337397
lg05	lm930	95.88	Chr05	104337428
lg05	lm940	95.928	Chr05	104337608
lg05	lm932	96.4	Chr05	104337430
lg05	lm929	96.482	Chr05	104337410
lg05	lm951	97.367	Chr05	105940976
lg05	np2082	98.012	Chr05	123862022
lg05	np2001	98.137	Chr05	64558655
lg05	lm898	98.538	Chr05	69872506
lg05	lm943	99.686	Chr05	104690048
lg05	lm927	100.693	Chr05	102780555
lg05	lm1005	101.369	Chr05	134123802
lg05	lm942	103.417	Chr05	104341078
lg05	lm937	104.361	Chr05	104337544
lg05	lm938	104.394	Chr05	104337560
lg05	lm934	104.726	Chr05	104337524
lg05	lm935	104.836	Chr05	104337530
lg05	lm941	105.989	Chr05	104341066
lg05	lm919	107.212	Chr05	86407807
lg05	lm992	108.293	Chr05	124373139
lg05	lm923	110.055	Chr05	92223345
lg05	lm1004	111.92	Chr05	134123759
lg06	np2376	0	Chr06	18273760
lg06	np2353	1.088	Chr06	6817519
lg06	np2375	2.162	Chr06	18273741
lg06	np2346	3.01	Chr06	5083512
lg06	np2391	4.371	Chr06	26697159
lg06	np2366	4.795	Chr06	16946020
lg06	np2348	5.397	Chr06	5230804
lg06	np2357	6.024	Chr06	8889024
lg06	np2372	6.138	Chr06	17886660
lg06	np2373	6.713	Chr06	18147200
lg06	np2371	7.083	Chr06	17660649
lg06	np2374	7.319	Chr06	18147210
lg06	np2368	7.733	Chr06	16946098
lg06	np2365	7.764	Chr06	16945899
lg06	np2367	7.911	Chr06	16946033
lg06	np2364	7.946	Chr06	16945876
lg06	np2370	8.225	Chr06	17427575
lg06	np2386	8.802	Chr06	22749821
lg06	np2382	9.105	Chr06	19478672
lg06	np2377	9.247	Chr06	19159962
lg06	np2378	9.431	Chr06	19159966
lg06	np2380	9.46	Chr06	19160118
lg06	np2383	10.605	Chr06	21985109
lg06	np2352	12.625	Chr06	6764611
lg06	np2402	14.774	Chr06	29399619
lg06	np2381	15.747	Chr06	19478619
lg06	np2423	17.793	Chr06	46385594
lg06	np2541	18.514	Chr06	95085041
lg06	np2404	20.046	Chr06	31134523
lg06	np2417	20.526	Chr06	43090370
lg06	np2416	21.134	Chr06	42374422
lg06	np2418	21.761	Chr06	43090457
lg06	np2442	22.851	Chr06	52863844
lg06	np2440	23.985	Chr06	52497577
lg06	np2361	27.849	Chr06	13849704
lg06	np2360	29.081	Chr06	13358393
lg06	np2451	29.688	Chr06	53669701
lg06	np2355	31.245	Chr06	8145374
lg06	np2413	32.01	Chr06	39837046
lg06	np2379	34.3	Chr06	19160024
lg06	np2359	36.441	Chr06	13298692
lg06	np2363	36.456	Chr06	16583868
lg06	np2358	36.497	Chr06	13298644
lg06	np2362	37.406	Chr06	15379148
lg06	np2347	38.04	Chr06	5083523
lg06	np2350	39.397	Chr06	5735603
lg06	np2398	40.438	Chr06	28313111
lg06	np2392	40.913	Chr06	26830170
lg06	np2400	41.232	Chr06	28313235
lg06	np2399	42.292	Chr06	28313117
lg06	np2397	42.839	Chr06	28100838
lg06	np2405	44.821	Chr06	32646619
lg06	np2454	47.217	Chr06	56361811
lg06	np2410	47.785	Chr06	38099133
lg06	np2407	48.314	Chr06	34493772
lg06	np2419	48.613	Chr06	44406290
lg06	np2420	48.722	Chr06	44406406
lg06	np2437	49.42	Chr06	52455057
lg06	np2424	49.867	Chr06	46385641
lg06	np2415	50.133	Chr06	40081049
lg06	np2414	50.299	Chr06	39837088
lg06	np2412	50.335	Chr06	39837009
lg06	np2422	50.797	Chr06	45220681
lg06	np2421	50.799	Chr06	45220642
lg06	np2425	51.005	Chr06	46463293
lg06	np2445	51.327	Chr06	53055339
lg06	np2426	51.415	Chr06	46463415
lg06	np2444	51.564	Chr06	53055262
lg06	np2443	51.62	Chr06	53055249
lg06	np2446	51.631	Chr06	53055383
lg06	np2447	51.683	Chr06	53055405
lg06	np2441	52.207	Chr06	52863715
lg06	np2458	52.886	Chr06	57385279
lg06	np2457	53.188	Chr06	57140069
lg06	np2463	53.754	Chr06	60266040
lg06	np2452	53.991	Chr06	55298042
lg06	np2470	55.2	Chr06	62249445
lg06	np2469	55.687	Chr06	62114780
lg06	np2472	56.982	Chr06	64199666
lg06	np2473	57.819	Chr06	64469354
lg06	np2471	58.265	Chr06	63675896
lg06	np2479	59.24	Chr06	66274843
lg06	np2482	60.17	Chr06	67182808
lg06	np2483	60.425	Chr06	67182921
lg06	np2484	60.704	Chr06	67187910
lg06	np2488	61.906	Chr06	68784988
lg06	np2503	62.78	Chr06	79153431
lg06	np2490	63.078	Chr06	73224636
lg06	np2486	63.946	Chr06	68759440
lg06	np2487	64.034	Chr06	68759538
lg06	np2461	64.416	Chr06	58653735
lg06	np2489	64.902	Chr06	69191941
lg06	np2843	66.59	Chr06	213303974
lg06	np2839	66.6	Chr06	213303822
lg06	np2838	66.629	Chr06	213303813
lg06	np2841	66.639	Chr06	213303892
lg06	np2842	66.986	Chr06	213303945
lg06	np2840	67.016	Chr06	213303823
lg06	np2511	67.603	Chr06	82810328
lg06	np2510	67.78	Chr06	82810258
lg06	np2512	67.933	Chr06	82810331
lg06	np2844	68.395	Chr06	213303987
lg06	np2514	69.284	Chr06	86876238
lg06	np2499	69.891	Chr06	78573495
lg06	np2502	70.07	Chr06	79088286
lg06	np2492	70.36	Chr06	75215234
lg06	np2497	70.452	Chr06	77654279
lg06	np2501	70.727	Chr06	78631078
lg06	np2498	70.931	Chr06	78573494
lg06	np2500	71.248	Chr06	78631034
lg06	np2495	71.385	Chr06	75216863
lg06	np2513	71.921	Chr06	85389610
lg06	np2517	72.739	Chr06	88573253
lg06	np2519	72.906	Chr06	88573295
lg06	np2515	73.597	Chr06	88227718
lg06	np2516	73.73	Chr06	88227731
lg06	np2518	74.268	Chr06	88573287
lg06	np2526	74.722	Chr06	90085357
lg06	np2538	75.539	Chr06	92595902
lg06	np2525	76.168	Chr06	89468457
lg06	np2520	76.337	Chr06	89009007
lg06	np2521	76.436	Chr06	89009018
lg06	np2533	77.301	Chr06	91434094
lg06	np2523	77.582	Chr06	89468368
lg06	np2534	77.935	Chr06	91440596
lg06	np2535	78.001	Chr06	91440647
lg06	np2556	79.874	Chr06	101006699
lg06	np2553	79.911	Chr06	101006540
lg06	np2554	80.162	Chr06	101006576
lg06	np2544	81.44	Chr06	96558686
lg06	np2565	81.818	Chr06	107288530
lg06	np2547	82.299	Chr06	97617157
lg06	np2578	82.422	Chr06	111547080
lg06	np2577	82.671	Chr06	111547058
lg06	np2536	82.867	Chr06	92367506
lg06	np2546	83.297	Chr06	97225217
lg06	np2562	83.627	Chr06	105935468
lg06	np2570	84.036	Chr06	109611102
lg06	np2558	84.254	Chr06	104592776
lg06	np2559	84.441	Chr06	104592856
lg06	np2567	84.938	Chr06	107337793
lg06	np2580	85.415	Chr06	111622988
lg06	np2581	85.617	Chr06	111623168
lg06	np2542	85.961	Chr06	96240790
lg06	np2571	86.307	Chr06	110988722
lg06	np2569	86.508	Chr06	109148753
lg06	np2583	86.628	Chr06	115198737
lg06	np2557	86.71	Chr06	104333603
lg06	np2572	87.042	Chr06	111273721
lg06	np2574	87.555	Chr06	111546637
lg06	np2575	87.616	Chr06	111546650
lg06	np2576	87.662	Chr06	111546673
lg06	np2579	87.957	Chr06	111599673
lg06	np2582	88.68	Chr06	112679191
lg06	np2588	90.172	Chr06	117198789
lg06	np2586	90.945	Chr06	117135827
lg06	np2607	91.122	Chr06	121683957
lg06	np2606	91.463	Chr06	121683767
lg06	np2591	91.665	Chr06	117733856
lg06	np2613	93.041	Chr06	127574788
lg06	np2713	94.834	Chr06	154999389
lg06	np2717	95.243	Chr06	155108857
lg06	np2723	95.261	Chr06	156071968
lg06	np2703	95.636	Chr06	154717711
lg06	np2707	95.797	Chr06	154999040
lg06	np2621	96.533	Chr06	132848003
lg06	np2666	97.206	Chr06	144416200
lg06	np2669	97.425	Chr06	144416233
lg06	np2629	97.708	Chr06	135988420
lg06	np2637	98.21	Chr06	139194795
lg06	np2708	98.969	Chr06	154999070
lg06	np2702	99.239	Chr06	154488642
lg06	np2716	99.507	Chr06	155108801
lg06	np2711	99.74	Chr06	154999311
lg06	np2714	99.785	Chr06	154999413
lg06	np2710	99.855	Chr06	154999257
lg06	np2721	100.141	Chr06	156071888
lg06	np2705	100.224	Chr06	154805630
lg06	np2722	100.228	Chr06	156071902
lg06	np2709	100.36	Chr06	154999127
lg06	np2725	100.627	Chr06	156097551
lg06	np2704	100.882	Chr06	154805629
lg06	np2712	101.482	Chr06	154999362
lg06	np2663	101.695	Chr06	144406952
lg06	np2656	101.946	Chr06	144364640
lg06	np2689	102.073	Chr06	150213107
lg06	np2634	102.177	Chr06	138773866
lg06	np2639	102.222	Chr06	139617501
lg06	np2715	102.344	Chr06	155001459
lg06	np2645	102.41	Chr06	140611228
lg06	np2640	102.485	Chr06	139617569
lg06	np2643	102.624	Chr06	140179474
lg06	np2635	102.646	Chr06	138844460
lg06	np2699	102.746	Chr06	152406927
lg06	np2636	102.819	Chr06	138844575
lg06	np2654	102.986	Chr06	143845536
lg06	np2718	102.988	Chr06	155703022
lg06	np2695	102.999	Chr06	152406864
lg06	np2719	103.009	Chr06	155703142
lg06	np2667	103.023	Chr06	144416207
lg06	np2694	103.025	Chr06	152406807
lg06	np2698	103.044	Chr06	152406906
lg06	np2642	103.076	Chr06	140179349
lg06	np2649	103.21	Chr06	141094201
lg06	np2732	103.228	Chr06	159116286
lg06	np2729	103.247	Chr06	156982253
lg06	np2706	103.408	Chr06	154805664
lg06	np2688	103.496	Chr06	147340359
lg06	np2632	103.555	Chr06	138063456
lg06	np2690	103.612	Chr06	151219139
lg06	np2696	103.765	Chr06	152406882
lg06	np2697	103.781	Chr06	152406902
lg06	np2652	103.897	Chr06	143521721
lg06	np2736	104.015	Chr06	161089118
lg06	np2687	104.107	Chr06	147327429
lg06	np2735	104.205	Chr06	160907347
lg06	np2650	104.29	Chr06	141116216
lg06	np2651	104.357	Chr06	141116382
lg06	np2661	104.71	Chr06	144406836
lg06	np2660	104.774	Chr06	144406790
lg06	np2662	104.999	Chr06	144406935
lg06	np2633	105.29	Chr06	138771978
lg06	np2672	105.622	Chr06	144416298
lg06	np2674	106.221	Chr06	144416371
lg06	np2668	106.27	Chr06	144416216
lg06	np2677	106.565	Chr06	144416386
lg06	hk794	106.964	Chr06	150365583
lg06	hk793	107.184	Chr06	150365547
lg06	np2679	107.547	Chr06	144429237
lg06	np2673	107.756	Chr06	144416316
lg06	np2676	107.794	Chr06	144416380
lg06	np2665	108.16	Chr06	144416199
lg06	np2730	108.898	Chr06	157783430
lg06	np2731	109.283	Chr06	158045517
lg06	np2655	109.824	Chr06	144015047
lg06	np2739	110.805	Chr06	163694509
lg06	np2746	111.125	Chr06	165531474
lg06	np2749	111.134	Chr06	165531627
lg06	np2744	111.417	Chr06	165531450
lg06	np2747	111.449	Chr06	165531523
lg06	np2745	111.497	Chr06	165531466
lg06	np2748	111.513	Chr06	165531528
lg06	np2740	112.317	Chr06	163694530
lg06	np2675	112.828	Chr06	144416377
lg06	np2741	113.648	Chr06	164283266
lg06	np2754	114.047	Chr06	169111487
lg06	np2659	115.03	Chr06	144388625
lg06	np2616	115.772	Chr06	131099572
lg06	np2757	116.381	Chr06	170595722
lg06	np2750	116.61	Chr06	167890997
lg06	np2680	117.431	Chr06	144429356
lg06	np2597	119.01	Chr06	118931361
lg06	hk828	119.265	Chr06	175082592
lg06	np2605	120.651	Chr06	121276376
lg06	np2753	121.214	Chr06	167983570
lg06	np2751	121.851	Chr06	167891001
lg06	np2752	122.063	Chr06	167891193
lg06	hk825	122.528	Chr06	170827964
lg06	hk826	123.195	Chr06	170828063
lg06	np2759	123.767	Chr06	174102349
lg06	np2763	124.14	Chr06	183186298
lg06	np2760	124.542	Chr06	174102355
lg06	np2765	125.04	Chr06	183186374
lg06	np2603	125.67	Chr06	119842757
lg06	np2764	126.134	Chr06	183186326
lg06	np2773	126.487	Chr06	185915839
lg06	np2769	127.011	Chr06	183667693
lg06	np2767	127.019	Chr06	183667610
lg06	np2624	128.542	Chr06	134030616
lg06	np2625	128.75	Chr06	134030761
lg06	np2626	128.938	Chr06	134030770
lg06	np2771	129.724	Chr06	185170718
lg06	np2623	130.25	Chr06	133065343
lg06	np2610	130.748	Chr06	125492815
lg06	np2614	131.577	Chr06	127576234
lg06	np2615	132.479	Chr06	129026279
lg06	np2611	133.246	Chr06	127574667
lg06	np2774	133.518	Chr06	186730214
lg06	np2587	133.631	Chr06	117198770
lg06	np2816	133.763	Chr06	205775478
lg06	np2828	134.795	Chr06	208486063
lg06	np2827	135.397	Chr06	208486020
lg06	np2638	135.567	Chr06	139373416
lg06	np2814	135.945	Chr06	203933817
lg06	np2819	136.734	Chr06	205956531
lg06	np2612	137.692	Chr06	127574771
lg06	np2833	137.777	Chr06	211027194
lg06	np2834	139.15	Chr06	211973665
lg06	np2758	140.539	Chr06	170828062
lg06	np2830	142.519	Chr06	209586444
lg06	np2770	143.426	Chr06	185170622
lg06	np2829	144.55	Chr06	209586418
lg06	np2831	144.685	Chr06	209586610
lg06	np2832	145.89	Chr06	209598693
lg06	np2835	147.809	Chr06	212759499
lg06	np2836	148.43	Chr06	212759581
lg06	np2837	149.42	Chr06	212759595
lg06	np2820	150.595	Chr06	206594963
lg06	np2826	154.361	Chr06	208155890
lg06	np2768	157.006	Chr06	183667679
lg06	np2825	159.073	Chr06	207460091
lg06	np2824	159.226	Chr06	207459998
lg06	np2818	159.668	Chr06	205886061
lg06	np2791	160.627	Chr06	190283137
lg06	np2798	161.195	Chr06	197026997
lg06	np2796	161.251	Chr06	197026948
lg06	np2797	161.329	Chr06	197026991
lg06	np2790	161.823	Chr06	189089631
lg06	np2817	162.438	Chr06	205792691
lg06	np2800	163.448	Chr06	198801804
lg06	np2799	163.7	Chr06	198749059
lg06	np2772	165.006	Chr06	185915807
lg07	np3343	0	Chr07	210826361
lg07	np3345	2.076	Chr07	213675929
lg07	np3344	3.162	Chr07	213675899
lg07	np3342	3.747	Chr07	209333956
lg07	np3340	3.808	Chr07	209267458
lg07	np3339	4.23	Chr07	209267331
lg07	np3326	4.896	Chr07	207112166
lg07	np3325	5.068	Chr07	207112088
lg07	np3320	5.661	Chr07	199394764
lg07	np3319	5.745	Chr07	199394573
lg07	np2992	7.74	Chr07	83994018
lg07	np2997	7.818	Chr07	83994245
lg07	np3318	8.304	Chr07	198702749
lg07	np2988	8.733	Chr07	79890265
lg07	np2970	9.038	Chr07	74188904
lg07	np3313	9.559	Chr07	195254748
lg07	np3312	9.59	Chr07	195254747
lg07	np3034	9.68	Chr07	104540254
lg07	np3314	9.873	Chr07	195254752
lg07	np2999	10.781	Chr07	84155032
lg07	np2998	10.855	Chr07	84154844
lg07	np3315	11.345	Chr07	195254790
lg07	np3307	11.766	Chr07	193483934
lg07	np3306	11.799	Chr07	193483924
lg07	np3308	11.966	Chr07	193483937
lg07	np3305	13.119	Chr07	192448282
lg07	np2971	15.346	Chr07	75717190
lg07	np2975	15.447	Chr07	76301409
lg07	np2972	15.616	Chr07	76301290
lg07	np2976	15.811	Chr07	77923839
lg07	np2973	15.824	Chr07	76301369
lg07	np2974	16.083	Chr07	76301376
lg07	np2966	16.104	Chr07	73428453
lg07	np2996	16.484	Chr07	83994121
lg07	np2994	16.516	Chr07	83994084
lg07	np2991	16.53	Chr07	83994016
lg07	np2995	16.654	Chr07	83994107
lg07	np2989	17.381	Chr07	83684324
lg07	np3004	18.16	Chr07	86636381
lg07	np3001	18.318	Chr07	86545171
lg07	np3000	18.776	Chr07	86545121
lg07	np3003	19.234	Chr07	86591228
lg07	np3323	19.984	Chr07	204980022
lg07	np3014	20.515	Chr07	92772761
lg07	np2897	21.339	Chr07	38440111
lg07	np3300	22.558	Chr07	189424013
lg07	np3010	23.032	Chr07	91028523
lg07	np3013	23.538	Chr07	92072637
lg07	np3019	23.851	Chr07	95037761
lg07	np3012	24.242	Chr07	91769158
lg07	np3009	24.321	Chr07	90944912
lg07	np3283	25.322	Chr07	181120037
lg07	np3028	25.711	Chr07	101764368
lg07	np3206	26.538	Chr07	154467772
lg07	np3150	26.884	Chr07	129659736
lg07	np3291	27.221	Chr07	184289124
lg07	np3290	27.231	Chr07	184289123
lg07	np3264	27.476	Chr07	171357693
lg07	np3228	27.686	Chr07	155232447
lg07	np3245	28.096	Chr07	165264257
lg07	np3250	28.193	Chr07	165264435
lg07	np3249	28.214	Chr07	165264434
lg07	np3246	28.293	Chr07	165264306
lg07	np3247	28.314	Chr07	165264318
lg07	np3256	28.491	Chr07	169081587
lg07	np3267	28.619	Chr07	173576172
lg07	np3232	28.887	Chr07	157375702
lg07	np3210	28.96	Chr07	155083172
lg07	np3321	29.17	Chr07	200530463
lg07	np3233	29.275	Chr07	157375830
lg07	np3234	29.356	Chr07	157375913
lg07	np3235	29.407	Chr07	157375925
lg07	np3259	29.432	Chr07	170773781
lg07	np3240	29.629	Chr07	161036615
lg07	np3238	29.948	Chr07	160958128
lg07	np3251	29.987	Chr07	167062540
lg07	np3322	30.023	Chr07	200530558
lg07	np3257	30.076	Chr07	169081652
lg07	np3255	30.093	Chr07	169081520
lg07	np3229	30.27	Chr07	156000106
lg07	np3262	30.433	Chr07	170989971
lg07	np3258	30.504	Chr07	169927363
lg07	np3151	31.07	Chr07	129659774
lg07	np3176	31.244	Chr07	140454528
lg07	np3174	31.398	Chr07	140454426
lg07	np3132	31.608	Chr07	127608615
lg07	np3134	31.668	Chr07	127608778
lg07	np3123	31.82	Chr07	123717194
lg07	np3055	32.022	Chr07	112081192
lg07	np3171	32.15	Chr07	140419719
lg07	np3070	32.436	Chr07	116011328
lg07	np3135	32.684	Chr07	127608801
lg07	np3140	32.8	Chr07	128921943
lg07	np3046	32.995	Chr07	111127872
lg07	np3043	33.15	Chr07	111127843
lg07	np3048	33.157	Chr07	111127921
lg07	np3044	33.183	Chr07	111127864
lg07	np3045	33.187	Chr07	111127869
lg07	np3068	33.319	Chr07	115049134
lg07	np3136	33.442	Chr07	127864865
lg07	np3063	33.547	Chr07	113755605
lg07	np3071	33.638	Chr07	116011361
lg07	np3154	33.719	Chr07	130030015
lg07	np3105	33.775	Chr07	120785137
lg07	np3155	33.842	Chr07	130187546
lg07	np3129	33.973	Chr07	127216795
lg07	np3130	33.989	Chr07	127216797
lg07	np3128	34.009	Chr07	127216703
lg07	np3113	34.022	Chr07	121296408
lg07	np3112	34.031	Chr07	121296388
lg07	np3115	34.057	Chr07	121296464
lg07	np3109	34.069	Chr07	121296348
lg07	np3116	34.089	Chr07	121296466
lg07	np3119	34.1	Chr07	121296556
lg07	np3110	34.11	Chr07	121296349
lg07	np3117	34.13	Chr07	121296506
lg07	np3111	34.165	Chr07	121296382
lg07	np3114	34.171	Chr07	121296438
lg07	np3118	34.199	Chr07	121296547
lg07	np3082	34.349	Chr07	118073995
lg07	np3066	34.471	Chr07	114741304
lg07	np3067	34.509	Chr07	114741316
lg07	np3083	34.552	Chr07	118074000
lg07	np3084	34.62	Chr07	118074007
lg07	np3153	34.708	Chr07	129995217
lg07	np3047	34.767	Chr07	111127903
lg07	np3086	34.828	Chr07	118191225
lg07	np3091	34.88	Chr07	120141922
lg07	np3079	34.939	Chr07	117728667
lg07	np3179	35.013	Chr07	140502298
lg07	np3090	35.033	Chr07	120141880
lg07	np3076	35.11	Chr07	117391469
lg07	np3065	35.23	Chr07	114232741
lg07	np3061	35.269	Chr07	113755528
lg07	np3064	35.271	Chr07	114232724
lg07	np3172	35.483	Chr07	140449963
lg07	np3199	35.578	Chr07	148067188
lg07	np3158	35.672	Chr07	131077147
lg07	np3184	35.848	Chr07	142412787
lg07	np3142	35.99	Chr07	129479036
lg07	np3029	36.279	Chr07	102547580
lg07	np3006	36.414	Chr07	87465322
lg07	np3173	36.512	Chr07	140450026
lg07	np3165	36.614	Chr07	134964452
lg07	np3187	36.836	Chr07	143275072
lg07	np3056	36.944	Chr07	112252444
lg07	np3152	37.251	Chr07	129659777
lg07	np3143	37.377	Chr07	129491587
lg07	np3178	37.567	Chr07	140497769
lg07	np3030	37.851	Chr07	102574726
lg07	np3260	38.372	Chr07	170773872
lg07	np3196	38.514	Chr07	146259587
lg07	np3106	38.72	Chr07	120785175
lg07	np3026	38.999	Chr07	99189198
lg07	np3270	39.46	Chr07	176724152
lg07	np3098	39.943	Chr07	120649267
lg07	np3122	40.167	Chr07	123717192
lg07	np3175	40.776	Chr07	140454517
lg07	np3263	41.616	Chr07	171357568
lg07	np3177	41.941	Chr07	140471353
lg07	np3268	42.523	Chr07	175929440
lg07	np3078	44.912	Chr07	117728654
lg07	np3080	45.037	Chr07	117728684
lg07	np3120	45.942	Chr07	122376905
lg07	np3077	50.949	Chr07	117728568
lg07	np3211	51.661	Chr07	155083233
lg07	np3121	52.824	Chr07	122376953
lg07	np3163	53.166	Chr07	134053261
lg07	np3022	54.095	Chr07	98116404
lg07	np3023	54.285	Chr07	98116406
lg07	np3025	54.407	Chr07	98147003
lg07	np3024	54.409	Chr07	98116463
lg07	np3224	55.821	Chr07	155203827
lg07	np3221	56.113	Chr07	155196778
lg07	np3218	56.482	Chr07	155194910
lg07	np3219	56.505	Chr07	155194922
lg07	np3217	56.585	Chr07	155194840
lg07	np3227	57.058	Chr07	155232394
lg07	np3189	57.493	Chr07	143898937
lg07	np3188	57.53	Chr07	143898936
lg07	np3021	58.093	Chr07	98116370
lg07	np3164	58.358	Chr07	134053299
lg07	np3074	58.751	Chr07	117228636
lg07	np3096	59.03	Chr07	120649258
lg07	np3103	59.053	Chr07	120649434
lg07	np3097	59.059	Chr07	120649266
lg07	np3093	59.089	Chr07	120649190
lg07	np3101	59.105	Chr07	120649402
lg07	np3102	59.105	Chr07	120649421
lg07	np3226	59.56	Chr07	155204044
lg07	np3060	59.683	Chr07	113755390
lg07	np3062	59.749	Chr07	113755578
lg07	np3075	60.039	Chr07	117373464
lg07	np3072	60.216	Chr07	116254608
lg07	np3085	60.566	Chr07	118074020
lg07	np3057	60.69	Chr07	112383759
lg07	np3183	60.814	Chr07	141775143
lg07	np3216	61.175	Chr07	155194547
lg07	np3214	61.274	Chr07	155194356
lg07	np3215	61.279	Chr07	155194366
lg07	np3203	61.471	Chr07	154258351
lg07	np3087	61.956	Chr07	119033376
lg07	np3036	62.131	Chr07	105623667
lg07	np3039	62.388	Chr07	106639298
lg07	np3038	62.453	Chr07	106639212
lg07	np3049	62.593	Chr07	111143161
lg07	np3157	62.778	Chr07	130695705
lg07	np3149	62.947	Chr07	129592975
lg07	np3205	63.208	Chr07	154423367
lg07	np3133	63.522	Chr07	127608744
lg07	np3162	63.722	Chr07	134053228
lg07	np3170	64.166	Chr07	139747075
lg07	np3192	64.36	Chr07	144703763
lg07	np3191	64.436	Chr07	144703646
lg07	np3169	64.517	Chr07	136843133
lg07	np3194	64.649	Chr07	144703791
lg07	np3193	64.65	Chr07	144703780
lg07	np3031	65.223	Chr07	102747533
lg07	np3212	65.363	Chr07	155186542
lg07	np3195	65.544	Chr07	146259534
lg07	np3202	65.776	Chr07	149302236
lg07	np3131	66.004	Chr07	127515519
lg07	np3011	66.442	Chr07	91028710
lg07	np3252	66.91	Chr07	167470163
lg07	np3204	67.127	Chr07	154326624
lg07	np3020	67.411	Chr07	95378158
lg07	np3015	67.576	Chr07	93299078
lg07	np3241	68.072	Chr07	161036634
lg07	np3253	68.227	Chr07	167687451
lg07	np3311	69.039	Chr07	194499578
lg07	np3271	69.341	Chr07	176724189
lg07	np3269	69.412	Chr07	176724143
lg07	np3275	69.725	Chr07	180211767
lg07	np3276	69.854	Chr07	180211842
lg07	np3284	70.381	Chr07	181431217
lg07	np3278	70.562	Chr07	180457965
lg07	np3280	70.604	Chr07	180875951
lg07	np3277	70.802	Chr07	180457840
lg07	np3279	70.96	Chr07	180875821
lg07	np3272	71.392	Chr07	176935758
lg07	np3299	71.567	Chr07	186995777
lg07	np3239	72.114	Chr07	160958196
lg07	np3243	72.364	Chr07	162334906
lg07	np3274	72.855	Chr07	177634139
lg07	np3293	73.795	Chr07	184289297
lg07	np3286	73.837	Chr07	183156309
lg07	np3292	73.893	Chr07	184289259
lg07	np3287	74.199	Chr07	183408617
lg07	np3288	74.296	Chr07	183408702
lg07	np3294	74.769	Chr07	184773503
lg07	np3296	74.818	Chr07	184773609
lg07	np3295	74.958	Chr07	184773564
lg07	np3297	75.333	Chr07	184773625
lg07	np3298	76.088	Chr07	185914226
lg07	np3201	76.936	Chr07	148498425
lg07	np3303	77.55	Chr07	192409799
lg07	np3304	78.348	Chr07	192409976
lg07	np3302	79.987	Chr07	190407304
lg08	np3356	0	Chr08	9841003
lg08	np3354	3.632	Chr08	8859047
lg08	np3352	4.553	Chr08	8530142
lg08	np3435	6.016	Chr08	39366011
lg08	np3383	8.036	Chr08	17418107
lg08	np3366	9.104	Chr08	12876454
lg08	np3365	9.269	Chr08	12876312
lg08	np3384	10.264	Chr08	17526751
lg08	np3364	12.132	Chr08	10780409
lg08	np3357	12.176	Chr08	10780270
lg08	np3359	12.284	Chr08	10780287
lg08	np3363	12.366	Chr08	10780401
lg08	np3358	12.437	Chr08	10780273
lg08	np3362	13.315	Chr08	10780369
lg08	np3434	17.886	Chr08	37899018
lg08	np3439	19.54	Chr08	40959598
lg08	np3437	20.38	Chr08	40144621
lg08	np3713	22.905	Chr08	178980132
lg08	np3753	23.894	Chr08	185417205
lg08	np3712	24.778	Chr08	178980130
lg08	np3740	25.798	Chr08	183032372
lg08	np3748	26.643	Chr08	183413640
lg08	np3746	27.192	Chr08	183400320
lg08	np3744	27.429	Chr08	183398846
lg08	np3745	27.466	Chr08	183398853
lg08	np3473	28.189	Chr08	63604921
lg08	np3743	28.805	Chr08	183390571
lg08	np3449	29.073	Chr08	50406295
lg08	np3751	29.742	Chr08	184418020
lg08	np3738	29.852	Chr08	182643951
lg08	np3754	29.981	Chr08	190867569
lg08	np3749	30.134	Chr08	184417933
lg08	np3750	30.171	Chr08	184417941
lg08	np3466	30.858	Chr08	60833204
lg08	np3470	30.9	Chr08	62044639
lg08	np3734	31.99	Chr08	182029264
lg08	np3733	32.029	Chr08	182029242
lg08	np3692	32.148	Chr08	176041790
lg08	np3694	32.169	Chr08	176042012
lg08	np3735	32.383	Chr08	182137118
lg08	np3736	32.403	Chr08	182137150
lg08	np3730	32.61	Chr08	181285857
lg08	np3464	32.896	Chr08	60833174
lg08	np3732	33.121	Chr08	181907907
lg08	np3693	33.222	Chr08	176041865
lg08	np3709	33.235	Chr08	178260860
lg08	np3688	33.435	Chr08	173776022
lg08	np3687	33.475	Chr08	173775993
lg08	np3690	33.54	Chr08	174756052
lg08	np3689	33.557	Chr08	174756043
lg08	np3458	33.983	Chr08	57338635
lg08	np3710	34.216	Chr08	178260914
lg08	np3467	34.495	Chr08	60944659
lg08	np3695	34.677	Chr08	176387349
lg08	np3682	34.852	Chr08	172329810
lg08	np3685	34.944	Chr08	172532659
lg08	np3683	35.251	Chr08	172532531
lg08	np3684	35.328	Chr08	172532602
lg08	np3474	36.216	Chr08	68798249
lg08	np3465	36.38	Chr08	60833182
lg08	np3675	37.188	Chr08	166838523
lg08	np3678	37.3	Chr08	169915221
lg08	np3668	37.431	Chr08	166466197
lg08	np3664	37.55	Chr08	166358844
lg08	np3674	37.663	Chr08	166838354
lg08	np3673	37.891	Chr08	166838304
lg08	np3655	38.037	Chr08	161432908
lg08	np3667	38.309	Chr08	166453947
lg08	np3666	38.423	Chr08	166436541
lg08	np3663	38.717	Chr08	165928990
lg08	np3651	38.93	Chr08	157752934
lg08	np3549	40.033	Chr08	102191205
lg08	np3480	40.562	Chr08	76787639
lg08	np3479	40.566	Chr08	76787634
lg08	np3481	41.064	Chr08	77097249
lg08	np3483	41.841	Chr08	79346881
lg08	np3482	41.921	Chr08	79346869
lg08	np3634	42.53	Chr08	152278036
lg08	np3638	42.648	Chr08	152278134
lg08	np3635	42.654	Chr08	152278073
lg08	np3637	42.679	Chr08	152278131
lg08	np3636	42.742	Chr08	152278111
lg08	np3484	43.255	Chr08	80054214
lg08	np3737	43.528	Chr08	182461550
lg08	np3562	44.012	Chr08	109823150
lg08	np3491	44.418	Chr08	82066484
lg08	np3492	44.432	Chr08	82066508
lg08	np3494	44.771	Chr08	82182719
lg08	np3495	44.955	Chr08	82182786
lg08	np3493	45.013	Chr08	82182718
lg08	np3496	45.023	Chr08	82182861
lg08	np3515	45.219	Chr08	86987743
lg08	np3535	45.327	Chr08	95457789
lg08	np3539	45.399	Chr08	99847449
lg08	np3537	45.535	Chr08	99481887
lg08	np3531	45.552	Chr08	94740123
lg08	np3530	45.626	Chr08	94740111
lg08	np3567	45.831	Chr08	112130462
lg08	np3488	46.045	Chr08	80189427
lg08	np3516	46.229	Chr08	88388448
lg08	np3577	46.445	Chr08	119599225
lg08	np3525	46.629	Chr08	90791766
lg08	np3587	47.026	Chr08	122389514
lg08	np3586	47.145	Chr08	122389497
lg08	np3584	47.211	Chr08	122070055
lg08	np3719	47.514	Chr08	179802859
lg08	np3588	47.627	Chr08	122389530
lg08	np3548	48.202	Chr08	101477398
lg08	np3555	48.793	Chr08	106288431
lg08	np3640	49.44	Chr08	152292441
lg08	np3641	49.455	Chr08	152292442
lg08	np3642	49.455	Chr08	152292444
lg08	np3639	49.482	Chr08	152292371
lg08	np3572	50.123	Chr08	116969705
lg08	np3554	50.421	Chr08	106078853
lg08	np3553	50.551	Chr08	106078737
lg08	np3561	51.032	Chr08	109818240
lg08	np3571	51.442	Chr08	116969675
lg08	np3573	51.677	Chr08	116969758
lg08	np3565	51.858	Chr08	111897345
lg08	np3566	51.94	Chr08	111897349
lg08	np3590	52.21	Chr08	133568089
lg08	np3599	53.428	Chr08	135009607
lg08	np3597	53.436	Chr08	135009575
lg08	np3594	53.438	Chr08	135009532
lg08	np3598	53.441	Chr08	135009605
lg08	np3601	53.449	Chr08	135009682
lg08	np3596	54.054	Chr08	135009553
lg08	np3592	54.722	Chr08	133657926
lg08	np3550	55.115	Chr08	103700842
lg08	np3716	55.939	Chr08	179767168
lg08	np3510	56.068	Chr08	85084008
lg08	np3513	56.297	Chr08	85752530
lg08	np3545	56.463	Chr08	101139802
lg08	np3551	56.638	Chr08	105084932
lg08	np3533	57.047	Chr08	94740193
lg08	np3511	57.283	Chr08	85084087
lg08	np3569	57.874	Chr08	113129988
lg08	np3570	58.044	Chr08	113130099
lg08	np3503	59.255	Chr08	84403761
lg08	np3544	59.742	Chr08	100996455
lg08	np3508	60.077	Chr08	84492727
lg08	np3490	61.72	Chr08	82066337
lg08	np3468	62.491	Chr08	61199395
lg08	np3469	63.062	Chr08	61667162
lg08	np3568	63.46	Chr08	112130481
lg08	np3741	64.679	Chr08	183341846
lg08	np3742	64.708	Chr08	183341975
lg08	np3582	65.505	Chr08	120337476
lg08	np3518	66.286	Chr08	89843354
lg08	np3524	66.663	Chr08	90529851
lg08	np3517	66.825	Chr08	89843353
lg08	np3528	67.262	Chr08	94155090
lg08	np3536	67.428	Chr08	98015122
lg08	np3521	68.039	Chr08	89859528
lg08	np3489	68.545	Chr08	82066295
lg08	np3520	68.927	Chr08	89859523
lg08	np3546	69.501	Chr08	101477283
lg08	np3547	69.604	Chr08	101477297
lg08	np3552	69.912	Chr08	106078723
lg08	np3486	70.495	Chr08	80189343
lg08	np3485	70.716	Chr08	80189287
lg08	np3563	70.944	Chr08	109828514
lg08	np3583	71.193	Chr08	120448320
lg08	np3529	71.457	Chr08	94157344
lg08	np3532	71.594	Chr08	94740152
lg08	np3585	71.905	Chr08	122176091
lg08	np3502	72.194	Chr08	84331707
lg08	np3558	72.433	Chr08	107649281
lg08	np3512	72.57	Chr08	85231357
lg08	np3509	72.672	Chr08	84492740
lg08	np3574	72.97	Chr08	117738599
lg08	np3534	73.273	Chr08	95457745
lg08	np3497	73.351	Chr08	83975068
lg08	np3501	73.541	Chr08	83995488
lg08	np3538	73.696	Chr08	99482048
lg08	np3543	73.82	Chr08	100989744
lg08	np3578	74.025	Chr08	119599232
lg08	np3557	74.381	Chr08	107350837
lg08	np3500	74.484	Chr08	83994478
lg08	np3602	74.929	Chr08	135009714
lg08	np3603	75.041	Chr08	135342329
lg08	np3593	75.132	Chr08	133686390
lg08	np3498	75.343	Chr08	83994404
lg08	np3526	75.904	Chr08	93160185
lg08	np3632	76.466	Chr08	151020224
lg08	np3628	76.522	Chr08	151020066
lg08	np3629	76.627	Chr08	151020117
lg08	np3607	76.842	Chr08	143056963
lg08	np3630	76.925	Chr08	151020150
lg08	np3626	77.119	Chr08	150901920
lg08	np3625	77.131	Chr08	150901908
lg08	np3627	77.143	Chr08	150901933
lg08	np3622	77.158	Chr08	150901810
lg08	np3621	77.353	Chr08	150901806
lg08	np3624	77.381	Chr08	150901903
lg08	np3620	77.562	Chr08	150549953
lg08	np3605	77.711	Chr08	142834994
lg08	np3615	77.885	Chr08	150549844
lg08	np3616	77.918	Chr08	150549893
lg08	np3618	77.986	Chr08	150549915
lg08	np3617	77.993	Chr08	150549895
lg08	np3633	78.248	Chr08	151408589
lg08	np3606	78.421	Chr08	142913907
lg08	np3619	78.71	Chr08	150549921
lg08	np3608	79.024	Chr08	143481984
lg08	np3609	79.122	Chr08	143482005
lg08	np3648	79.29	Chr08	157001072
lg08	np3604	79.367	Chr08	139971600
lg08	np3650	79.788	Chr08	157270407
lg08	np3653	80.394	Chr08	159942123
lg08	np3691	81.207	Chr08	174806647
lg08	np3756	81.355	Chr08	191463191
lg08	np3739	81.387	Chr08	182644026
lg08	np3697	81.646	Chr08	176451728
lg08	np3698	81.784	Chr08	176451731
lg08	np3705	82.048	Chr08	177985081
lg08	np3704	82.115	Chr08	177985042
lg08	np3707	82.173	Chr08	177985150
lg08	np3696	82.55	Chr08	176390812
lg08	np3711	82.62	Chr08	178980035
lg08	np3708	83.02	Chr08	177985184
lg08	np3706	83.074	Chr08	177985131
lg08	np3759	83.735	Chr08	195714938
lg08	np3611	84.254	Chr08	150324513
lg08	np3614	84.751	Chr08	150351940
lg08	np3612	84.779	Chr08	150351782
lg08	np3457	86.274	Chr08	57338609
lg08	np3505	86.897	Chr08	84439074
lg08	np3760	87.576	Chr08	195919211
lg08	np3671	88.055	Chr08	166537177
lg08	np3670	88.118	Chr08	166537175
lg08	np3454	88.564	Chr08	56590216
lg08	np3672	88.909	Chr08	166537211
lg08	np3665	89.384	Chr08	166436415
lg08	np3504	90.375	Chr08	84404395
lg09	np3811	0	Chr09	13567271
lg09	np3810	1.413	Chr09	13567255
lg09	np3785	3.576	Chr09	8748490
lg09	np3794	4.438	Chr09	11181464
lg09	np3791	5.222	Chr09	10199013
lg09	np3792	5.296	Chr09	10343718
lg09	np3809	6.564	Chr09	13536208
lg09	np3784	7.096	Chr09	8677834
lg09	np3820	8.156	Chr09	18484469
lg09	np3862	10.07	Chr09	44989371
lg09	np3817	11.151	Chr09	16838444
lg09	np3824	11.79	Chr09	20591509
lg09	np3825	12.658	Chr09	20722883
lg09	np3821	12.746	Chr09	19077461
lg09	np3822	12.85	Chr09	19077500
lg09	np3819	13.301	Chr09	17427191
lg09	np3823	13.934	Chr09	20569445
lg09	np3818	16.558	Chr09	16891546
lg09	np3894	17.44	Chr09	56849890
lg09	np3830	18.763	Chr09	29331406
lg09	np3832	18.982	Chr09	29331481
lg09	np3831	19.187	Chr09	29331429
lg09	np3843	22.57	Chr09	35818412
lg09	np3884	23.316	Chr09	53715650
lg09	np3866	23.835	Chr09	46497250
lg09	np3883	24.208	Chr09	53258222
lg09	np3857	24.993	Chr09	43775148
lg09	np3859	25.264	Chr09	43775241
lg09	np3856	25.603	Chr09	43775133
lg09	np3886	26.327	Chr09	55032094
lg09	np3878	26.855	Chr09	51495349
lg09	np3879	26.882	Chr09	51495408
lg09	np3882	27.195	Chr09	52073577
lg09	np3876	27.701	Chr09	48263610
lg09	np3875	27.719	Chr09	48263488
lg09	np3852	28.211	Chr09	42530504
lg09	np3887	28.72	Chr09	56691033
lg09	np3888	28.722	Chr09	56691074
lg09	np3892	29.006	Chr09	56849796
lg09	np3901	29.352	Chr09	70060396
lg09	np3873	29.964	Chr09	48218354
lg09	np3872	30.12	Chr09	48218292
lg09	np3874	30.757	Chr09	48218383
lg09	np3893	31.405	Chr09	56849821
lg09	np3909	32.958	Chr09	75693501
[truncated: 1,771 more rows]
