# Supplementary material for: Identification of QTL controlling volatile terpene contents in tea plant (Camellia sinensis) using a high-aroma ‘Huangdan’ x ‘Jinxuan’ F1 population
Source: Front Plant Sci. 2023 Mar 29;14:1130582. doi: 10.3389/fpls.2023.1130582 (PMC10090551; doi:10.3389/fpls.2023.1130582)
Supplement: Supplementary file 3 [file Table_2.xlsx]

## Sheet: Sheet1
GeneID	gene_chr	gene_start	gene_end	gene_strand	gene_length	ortholog	Preferred_name	GOs	EC	KEGG_ko	KEGG_Pathway	Description
HD.08G0029890	Chr05	12209394	12218223	-	2042	29760.VIT_19s0015g00500.t01		GO:0000272,GO:0005575,GO:0005622,GO:0005623,GO:0005737,GO:0005975,GO:0005976,GO:0005982,GO:0005983,GO:0006073,GO:0008150,GO:0008152,GO:0009056,GO:0009057,GO:0009251,GO:0009507,GO:0009536,GO:0009987,GO:0016052,GO:0043170,GO:0043226,GO:0043227,GO:0043229,GO:0043231,GO:0044042,GO:0044237,GO:0044238,GO:0044247,GO:0044248,GO:0044260,GO:0044262,GO:0044264,GO:0044275,GO:0044424,GO:0044444,GO:0044464,GO:…	3.2.1.2	ko:K01177	ko00500,map00500	Inactive beta-amylase 4
HD.08G0026740	Chr05	27489677	27491149	+	1064	3983.cassava4.1_002367m						G-type lectin S-receptor-like serine threonine-protein kinase
HD.08G0028360	Chr05	16909680	16912556	+	1959	3641.EOY22008			3.6.4.13	ko:K12813	ko03040,map03040	Pre-mRNA-splicing factor ATP-dependent RNA helicase
HD.08G0016470	Chr05	95294195	95302062	-	1579	29760.VIT_12s0134g00020.t01			4.2.3.108,4.2.3.111,4.2.3.27	ko:K07385,ko:K12742,ko:K18108	ko00900,ko00902,ko01100,ko01110,map00900,map00902,map01100,map01110	synthase
HD.08G0026970	Chr05	26421240	26426713	+	1317	3712.Bo2g010190.1		GO:0003674,GO:0003700,GO:0005575,GO:0005622,GO:0005623,GO:0005634,GO:0005737,GO:0005829,GO:0006355,GO:0008150,GO:0009314,GO:0009416,GO:0009628,GO:0009889,GO:0010468,GO:0010556,GO:0019219,GO:0019222,GO:0031323,GO:0031326,GO:0043226,GO:0043227,GO:0043229,GO:0043231,GO:0044424,GO:0044444,GO:0044464,GO:0050789,GO:0050794,GO:0050896,GO:0051171,GO:0051252,GO:0060255,GO:0065007,GO:0080090,GO:0140110,GO:…				KNOTTED1-like homeobox gene
HD.08G0022120	Chr05	61457819	61461716	-	754	4432.XP_010269716.1				ko:K02907	ko03010,map03010	RIBOSOMAL protein
HD.08G0014050	Chr05	116565825	116569628	+	381	981085.XP_010100483.1		GO:0000166,GO:0003674,GO:0003824,GO:0004029,GO:0005488,GO:0005524,GO:0005575,GO:0005622,GO:0005623,GO:0005737,GO:0005739,GO:0008144,GO:0008150,GO:0008152,GO:0009507,GO:0009536,GO:0010035,GO:0010038,GO:0016491,GO:0016620,GO:0016903,GO:0017076,GO:0030554,GO:0032553,GO:0032555,GO:0032559,GO:0035639,GO:0036094,GO:0042221,GO:0043167,GO:0043168,GO:0043226,GO:0043227,GO:0043229,GO:0043231,GO:0044424,GO:…	1.2.1.3	ko:K00128	ko00010,ko00053,ko00071,ko00280,ko00310,ko00330,ko00340,ko00380,ko00410,ko00561,ko00620,ko00625,ko00903,ko00981,ko01100,ko01110,ko01120,ko01130,map00010,map00053,map00071,map00280,map00310,map00330,map00340,map00380,map00410,map00561,map00620,map00625,map00903,map00981,map01100,map01110,map01120,map01130	Aldehyde dehydrogenase family
HD.08G0014270	Chr05	115379878	115381427	-	1550	29760.VIT_12s0034g00160.t01		GO:0001101,GO:0003674,GO:0003824,GO:0005575,GO:0005622,GO:0005623,GO:0005737,GO:0005829,GO:0006066,GO:0006082,GO:0006629,GO:0006714,GO:0006720,GO:0006721,GO:0006950,GO:0006970,GO:0008150,GO:0008152,GO:0008194,GO:0008300,GO:0009056,GO:0009628,GO:0009651,GO:0009687,GO:0009719,GO:0009725,GO:0009737,GO:0009987,GO:0010033,GO:0016020,GO:0016042,GO:0016054,GO:0016107,GO:0016115,GO:0016740,GO:0016757,GO:…				Belongs to the UDP-glycosyltransferase family
HD.08G0016410	Chr05	95822614	95845349	-	2026	3988.XP_002515689.1			4.2.3.112,4.2.3.16	ko:K21926	ko00902,ko01100,ko01110,map00902,map01100,map01110	synthase
HD.08G0022160	Chr05	61315935	61332757	+	3323	29760.VIT_19s0014g00830.t01		GO:0003674,GO:0003824,GO:0004672,GO:0004674,GO:0005575,GO:0005623,GO:0005886,GO:0006464,GO:0006468,GO:0006793,GO:0006796,GO:0006807,GO:0008150,GO:0008152,GO:0009987,GO:0016020,GO:0016301,GO:0016310,GO:0016740,GO:0016772,GO:0016773,GO:0019538,GO:0036211,GO:0043170,GO:0043412,GO:0044237,GO:0044238,GO:0044260,GO:0044267,GO:0044464,GO:0071704,GO:0071944,GO:0140096,GO:1901564				LRR receptor-like serine threonine-protein kinase
HD.08G0014610	Chr05	110350502	110354894	+	1755	29760.VIT_12s0028g03870.t01						Pentatricopeptide repeat-containing protein
HD.08G0021010	Chr05	68821254	68828682	+	2383	29760.VIT_12s0057g00400.t01		GO:0000003,GO:0003006,GO:0003674,GO:0003824,GO:0004812,GO:0004829,GO:0005575,GO:0005622,GO:0005623,GO:0005737,GO:0005739,GO:0006082,GO:0006139,GO:0006399,GO:0006412,GO:0006418,GO:0006435,GO:0006518,GO:0006520,GO:0006725,GO:0006807,GO:0007275,GO:0008150,GO:0008152,GO:0009058,GO:0009059,GO:0009507,GO:0009532,GO:0009536,GO:0009570,GO:0009790,GO:0009791,GO:0009793,GO:0009987,GO:0010154,GO:0010467,GO:…	6.1.1.3	ko:K01868	ko00970,map00970	threonine-tRNA ligase
HD.05000046	Chr05	886830	893144	+	1475	29760.VIT_08s0040g02740.t01			4.2.2.2	ko:K01728	ko00040,ko02024,map00040,map02024	Pectate lyase
HD.05008499	Chr05	143286091	143296253	+	1212	57918.XP_004296734.1		GO:0000375,GO:0000377,GO:0000387,GO:0000398,GO:0005575,GO:0005622,GO:0005623,GO:0005634,GO:0005654,GO:0005730,GO:0005737,GO:0005829,GO:0006139,GO:0006396,GO:0006397,GO:0006725,GO:0006807,GO:0008150,GO:0008152,GO:0008380,GO:0009987,GO:0010467,GO:0016043,GO:0016070,GO:0016071,GO:0016604,GO:0022607,GO:0022613,GO:0022618,GO:0031974,GO:0031981,GO:0032797,GO:0032991,GO:0034622,GO:0034641,GO:0034719,GO:…		ko:K13130	ko03013,map03013	Survival motor neuron (SMN) interacting protein 1 (SIP1)
HD.08G0029030	Chr05	14682259	14708004	-	3879	2711.XP_006475020.1	VTC2	GO:0000302,GO:0001101,GO:0003674,GO:0003824,GO:0004645,GO:0005575,GO:0005622,GO:0005623,GO:0005737,GO:0005975,GO:0005996,GO:0006006,GO:0006082,GO:0006732,GO:0006766,GO:0006767,GO:0006950,GO:0006952,GO:0006979,GO:0008150,GO:0008152,GO:0008194,GO:0008905,GO:0008928,GO:0009058,GO:0009108,GO:0009110,GO:0009266,GO:0009408,GO:0009605,GO:0009607,GO:0009617,GO:0009628,GO:0009719,GO:0009725,GO:0009753,GO:…	2.7.7.69	ko:K14190	ko00053,ko01100,ko01110,map00053,map01100,map01110	GDP-L-galactose phosphorylase
HD.05008185	Chr05	138258097	138259062	-	621	2711.XP_006492785.1
HD.08G0028840	Chr05	15405025	15408549	+	2163	3988.XP_002518861.1		GO:0001101,GO:0003674,GO:0003700,GO:0005575,GO:0005622,GO:0005623,GO:0005634,GO:0006082,GO:0006355,GO:0006807,GO:0006950,GO:0008150,GO:0008152,GO:0009414,GO:0009415,GO:0009628,GO:0009889,GO:0009987,GO:0010035,GO:0010118,GO:0010167,GO:0010468,GO:0010556,GO:0019219,GO:0019222,GO:0031323,GO:0031326,GO:0042126,GO:0042128,GO:0042221,GO:0043226,GO:0043227,GO:0043229,GO:0043231,GO:0043436,GO:0044237,GO:…				RWP-RK domain
HD.08G0015120	Chr05	106915261	106921129	+	968	29760.VIT_19s0085g01120.t01		GO:0005575,GO:0005622,GO:0005623,GO:0005634,GO:0005654,GO:0016592,GO:0031974,GO:0031981,GO:0032991,GO:0043226,GO:0043227,GO:0043229,GO:0043231,GO:0043233,GO:0044422,GO:0044424,GO:0044428,GO:0044446,GO:0044451,GO:0044464,GO:0070013		ko:K15139		mediator of RNA polymerase II transcription subunit
HD.08G0002490	Chr05	206797330	206805634	+	2697	29760.VIT_05s0020g02130.t01	CLA1	GO:0003674,GO:0003824,GO:0005575,GO:0005622,GO:0005623,GO:0005737,GO:0006081,GO:0006082,GO:0006090,GO:0006629,GO:0006644,GO:0006720,GO:0006725,GO:0006778,GO:0006779,GO:0006793,GO:0006796,GO:0006807,GO:0008150,GO:0008152,GO:0008299,GO:0008610,GO:0008654,GO:0008661,GO:0009058,GO:0009240,GO:0009507,GO:0009536,GO:0009987,GO:0015994,GO:0015995,GO:0016740,GO:0016744,GO:0018130,GO:0019288,GO:0019438,GO:…	2.2.1.7	ko:K01662	ko00730,ko00900,ko01100,ko01110,ko01130,map00730,map00900,map01100,map01110,map01130	1-deoxy-D-xylulose-5-phosphate synthase
HD.08G0023780	Chr05	45029996	45033220	-	1652	29760.VIT_17s0000g09510.t01			1.14.14.1	ko:K07418	ko00590,ko00591,ko01100,ko04212,ko04726,ko04750,ko04913,map00590,map00591,map01100,map04212,map04726,map04750,map04913	cytochrome P450
HD.05001048	Chr05	15326030	15327681	-	1652
HD.08G0021230	Chr05	68080940	68085219	+	2342	29760.VIT_12s0057g00560.t01	PAT1	GO:0003674,GO:0003676,GO:0003677,GO:0003700,GO:0005488,GO:0005575,GO:0005622,GO:0005623,GO:0005634,GO:0005737,GO:0006355,GO:0007154,GO:0007165,GO:0007275,GO:0007602,GO:0008150,GO:0009314,GO:0009416,GO:0009581,GO:0009582,GO:0009583,GO:0009585,GO:0009605,GO:0009628,GO:0009639,GO:0009640,GO:0009791,GO:0009889,GO:0009987,GO:0010017,GO:0010468,GO:0010556,GO:0019219,GO:0019222,GO:0023052,GO:0031323,GO:…				Belongs to the GRAS family
HD.08G0000740	Chr05	214169744	214178666	-	2293	29760.VIT_05s0077g01010.t01	MBB1	GO:0003674,GO:0003676,GO:0003723,GO:0003727,GO:0005488,GO:0005515,GO:0005575,GO:0005622,GO:0005623,GO:0005737,GO:0005773,GO:0005774,GO:0006139,GO:0006396,GO:0006397,GO:0006417,GO:0006725,GO:0006807,GO:0006996,GO:0008150,GO:0008152,GO:0009314,GO:0009416,GO:0009507,GO:0009526,GO:0009532,GO:0009536,GO:0009570,GO:0009628,GO:0009639,GO:0009657,GO:0009889,GO:0009892,GO:0009941,GO:0009987,GO:0010114,GO:…		ko:K20310		PsbB mRNA maturation factor Mbb1
HD.08G0020050	Chr05	78376337	78388116	+	1669	225117.XP_009347137.1	HPL	GO:0003674,GO:0003824,GO:0004497,GO:0005575,GO:0005622,GO:0005623,GO:0005737,GO:0006082,GO:0006629,GO:0006631,GO:0006950,GO:0008150,GO:0008152,GO:0008202,GO:0009507,GO:0009526,GO:0009536,GO:0009611,GO:0009941,GO:0009987,GO:0016125,GO:0016491,GO:0019752,GO:0031967,GO:0031975,GO:0032787,GO:0043226,GO:0043227,GO:0043229,GO:0043231,GO:0043436,GO:0044237,GO:0044238,GO:0044255,GO:0044281,GO:0044422,GO:…		ko:K10528	ko00592,ko01110,map00592,map01110	Belongs to the cytochrome P450 family
HD.05012604	Chr05	210887861	210888344	-	396
HD.08G0025970	Chr05	33969547	33973527	+	1430	71139.XP_010060532.1	PORA	GO:0003674,GO:0003824,GO:0005488,GO:0005515,GO:0005575,GO:0005622,GO:0005623,GO:0005737,GO:0007275,GO:0008150,GO:0008152,GO:0009314,GO:0009416,GO:0009507,GO:0009526,GO:0009527,GO:0009534,GO:0009535,GO:0009536,GO:0009579,GO:0009628,GO:0009639,GO:0009640,GO:0009642,GO:0009646,GO:0009647,GO:0009707,GO:0009719,GO:0009723,GO:0009725,GO:0009791,GO:0009941,GO:0010033,GO:0016020,GO:0016491,GO:0016627,GO:…	1.3.1.33	ko:K00218	ko00860,ko01100,ko01110,map00860,map01100,map01110	protochlorophyllide
HD.08G0016430	Chr05	95613101	95628476	-	1965	29760.VIT_12s0134g00020.t01			4.2.3.108,4.2.3.111,4.2.3.27	ko:K07385,ko:K12742,ko:K18108	ko00900,ko00902,ko01100,ko01110,map00900,map00902,map01100,map01110	synthase
HD.05013284	Chr05	221004374	221005512	-	762	29760.VIT_07s0129g00370.t01						expressed protein
HD.05007231	Chr05	119786605	119789016	-	2412	4098.XP_009629313.1
HD.05002966	Chr05	45710932	45731347	+	408
HD.08G0005000	Chr05	193209264	193211785	+	1803	29760.VIT_05s0020g04540.t01	KCS2	GO:0003674,GO:0003824,GO:0004312,GO:0006725,GO:0006950,GO:0006970,GO:0008150,GO:0008152,GO:0009058,GO:0009266,GO:0009314,GO:0009409,GO:0009416,GO:0009611,GO:0009628,GO:0009698,GO:0009699,GO:0009922,GO:0009987,GO:0010345,GO:0016740,GO:0016746,GO:0016747,GO:0019438,GO:0019748,GO:0044237,GO:0044249,GO:0044550,GO:0050896,GO:0071704,GO:1901360,GO:1901362,GO:1901576	2.3.1.199	ko:K15397	ko00062,ko01110,map00062,map01110	3-ketoacyl-coa synthase
HD.05012052	Chr05	203043436	203044286	-	509	3641.EOY05573
HD.05000531	Chr05	8126172	8146847	+	2399	4096.XP_009791849.1						Cellulose synthase
HD.08G0013620	Chr05	122831399	122849168	-	1281	981085.XP_010099368.1		GO:0003674,GO:0003824,GO:0005575,GO:0005622,GO:0005623,GO:0005737,GO:0005773,GO:0005794,GO:0005911,GO:0008150,GO:0008374,GO:0009506,GO:0009987,GO:0012505,GO:0016407,GO:0016413,GO:0016740,GO:0016746,GO:0016747,GO:0030054,GO:0043226,GO:0043227,GO:0043229,GO:0043231,GO:0044424,GO:0044444,GO:0044464,GO:0055044,GO:0071554				GDSL/SGNH-like Acyl-Esterase family found in Pmr5 and Cas1p
HD.08G0004270	Chr05	197924585	197927893	+	1832	3641.EOY05771	IQD19	GO:0005575,GO:0005622,GO:0005623,GO:0005737,GO:0005829,GO:0005856,GO:0005875,GO:0005886,GO:0015630,GO:0016020,GO:0032991,GO:0043226,GO:0043228,GO:0043229,GO:0043232,GO:0044422,GO:0044424,GO:0044430,GO:0044444,GO:0044446,GO:0044464,GO:0071944				IQ-domain
HD.08G0026150	Chr05	32914588	32918138	-	3227	3641.EOY12828		GO:0002376,GO:0003674,GO:0003824,GO:0004672,GO:0005575,GO:0005623,GO:0005886,GO:0005911,GO:0006464,GO:0006468,GO:0006793,GO:0006796,GO:0006807,GO:0006950,GO:0006952,GO:0006955,GO:0008150,GO:0008152,GO:0009506,GO:0009605,GO:0009607,GO:0009620,GO:0009814,GO:0009817,GO:0009987,GO:0016020,GO:0016301,GO:0016310,GO:0016740,GO:0016772,GO:0016773,GO:0019538,GO:0030054,GO:0036211,GO:0043170,GO:0043207,GO:…				receptor-like protein kinase
HD.08G0030950	Chr05	8203332	8207624	+	1836	4096.XP_009791849.1						Cellulose synthase
HD.04G0003870	Chr05	203530237	203531625	-	1389	102107.XP_008222987.1						Belongs to the peptidase A1 family
HD.05009665	Chr05	162540535	162572114	-	1696	29760.VIT_05s0051g00870.t01		GO:0000302,GO:0000305,GO:0003674,GO:0003824,GO:0004362,GO:0005575,GO:0005622,GO:0005623,GO:0005737,GO:0005777,GO:0006950,GO:0006979,GO:0008150,GO:0008152,GO:0009636,GO:0009987,GO:0010035,GO:0015036,GO:0015037,GO:0015038,GO:0016209,GO:0016491,GO:0016651,GO:0016667,GO:0016668,GO:0019725,GO:0042221,GO:0042579,GO:0042592,GO:0043226,GO:0043227,GO:0043229,GO:0043231,GO:0044424,GO:0044444,GO:0044464,GO:…	1.8.1.7	ko:K00383	ko00480,ko04918,map00480,map04918	Belongs to the class-I pyridine nucleotide-disulfide oxidoreductase family
HD.05002948	Chr05	45367877	45368654	+	778	4432.XP_010257766.1
HD.05001039	Chr05	15228114	15228909	-	698	3656.XP_008457902.1		GO:0000122,GO:0001101,GO:0001837,GO:0003674,GO:0003676,GO:0003723,GO:0003729,GO:0003730,GO:0005488,GO:0005575,GO:0005622,GO:0005623,GO:0005634,GO:0005654,GO:0005667,GO:0005737,GO:0005829,GO:0005849,GO:0006139,GO:0006355,GO:0006357,GO:0006378,GO:0006379,GO:0006396,GO:0006397,GO:0006725,GO:0006807,GO:0006950,GO:0006952,GO:0007154,GO:0007165,GO:0007275,GO:0007568,GO:0008150,GO:0008152,GO:0008219,GO:…		ko:K12741	ko03040,map03040	UBP1-associated protein 2A-like
HD.08G0021990	Chr05	62212214	62215376	-	1628	4096.XP_009761922.1						domain in FBox and BRCT domain containing plant proteins
HD.08G0017330	Chr05	223370451	223372820	-	1607	29760.VIT_07s0129g00230.t01		GO:0001871,GO:0003674,GO:0003824,GO:0004553,GO:0005488,GO:0005575,GO:0005623,GO:0005886,GO:0016020,GO:0016787,GO:0016798,GO:0030246,GO:0030247,GO:0031224,GO:0031225,GO:0031226,GO:0044425,GO:0044459,GO:0044464,GO:0046658,GO:0071944				Belongs to the glycosyl hydrolase 17 family
HD.05005317	Chr05	85323778	85324674	-	897	3983.cassava4.1_032410m						Leucine rich repeat N-terminal domain
HD.08G0005440	Chr05	188882594	188883662	+	986	57918.XP_004289128.1				ko:K15502,ko:K15503		ankyrin repeat-containing protein
HD.08G0014430	Chr05	114332878	114345291	+	375	3847.GLYMA13G37280.1		GO:0000325,GO:0001508,GO:0003674,GO:0005215,GO:0005216,GO:0005244,GO:0005245,GO:0005261,GO:0005262,GO:0005488,GO:0005515,GO:0005575,GO:0005622,GO:0005623,GO:0005737,GO:0005773,GO:0005774,GO:0005794,GO:0005886,GO:0006810,GO:0006811,GO:0006812,GO:0006816,GO:0007154,GO:0007165,GO:0007275,GO:0008150,GO:0008324,GO:0009791,GO:0009845,GO:0009889,GO:0009987,GO:0010119,GO:0010565,GO:0010817,GO:0012505,GO:…		ko:K04344,ko:K04851,ko:K04855,ko:K04856,ko:K16900	ko04010,ko04020,ko04022,ko04024,ko04218,ko04260,ko04261,ko04270,ko04530,ko04713,ko04721,ko04723,ko04724,ko04725,ko04726,ko04727,ko04728,ko04730,ko04742,ko04911,ko04912,ko04921,ko04924,ko04925,ko04927,ko04930,ko04934,ko04973,ko05010,ko05031,ko05032,ko05033,ko05410,ko05412,ko05414,map04010,map04020,map04022,map04024,map04218,map04260,map04261,map04270,map04530,map04713,map04721,map04723,map04724,ma…	Two pore calcium channel protein
HD.05012381	Chr05	207946222	207950162	+	2541	2711.XP_006489140.1			2.7.11.1	ko:K04730	ko04010,ko04064,ko04620,ko04624,ko04722,ko05133,ko05140,ko05142,ko05145,ko05152,ko05162,ko05169,map04010,map04064,map04620,map04624,map04722,map05133,map05140,map05142,map05145,map05152,map05162,map05169	belongs to the protein kinase superfamily
HD.08G0012600	Chr05	198900987	198921802	+	1362	102107.XP_008243078.1		GO:0003674,GO:0003824,GO:0005575,GO:0005622,GO:0005623,GO:0005737,GO:0005829,GO:0006139,GO:0006148,GO:0006152,GO:0006725,GO:0006807,GO:0007275,GO:0007568,GO:0008150,GO:0008152,GO:0008194,GO:0008477,GO:0009056,GO:0009116,GO:0009119,GO:0009164,GO:0009987,GO:0010150,GO:0016740,GO:0016757,GO:0016758,GO:0016787,GO:0016798,GO:0016799,GO:0019439,GO:0032501,GO:0032502,GO:0034641,GO:0034655,GO:0034656,GO:…	3.2.2.3	ko:K01240	ko00240,ko00760,map00240,map00760	uridine nucleosidase
HD.08G0006900	Chr05	177993321	177996065	-	1786	3988.XP_002524159.1		GO:0005575,GO:0005623,GO:0005886,GO:0016020,GO:0044464,GO:0071944				Ordered Locus Names sll0103
HD.05003450	Chr05	53763684	53766610	+	458	29760.VIT_01s0010g00800.t01
HD.05003029	Chr05	46697312	46698389	-	1078
HD.08G0016350	Chr05	96466412	96467937	+	1292	29760.VIT_12s0134g00400.t01		GO:0003674,GO:0003700,GO:0006355,GO:0008150,GO:0009889,GO:0010468,GO:0010556,GO:0019219,GO:0019222,GO:0031323,GO:0031326,GO:0050789,GO:0050794,GO:0051171,GO:0051252,GO:0060255,GO:0065007,GO:0080090,GO:0140110,GO:1903506,GO:2000112,GO:2001141				Zinc finger protein
HD.08G0006690	Chr05	179387017	179393520	-	734	102107.XP_008224138.1		GO:0005575,GO:0005622,GO:0005623,GO:0005737,GO:0005777,GO:0005778,GO:0005779,GO:0016020,GO:0016021,GO:0031090,GO:0031224,GO:0031231,GO:0031300,GO:0031301,GO:0031903,GO:0042579,GO:0043226,GO:0043227,GO:0043229,GO:0043231,GO:0044422,GO:0044424,GO:0044425,GO:0044438,GO:0044439,GO:0044444,GO:0044446,GO:0044464,GO:0098588,GO:0098805		ko:K13347,ko:K13348	ko04146,map04146	Belongs to the peroxisomal membrane protein PXMP2 4 family
HD.08G0020090	Chr05	78090755	78094639	+	1112	4098.XP_009598109.1						Ribonuclease III family
HD.05003874	Chr05	61239245	61256004	+	3162	29760.VIT_19s0014g00830.t01		GO:0003674,GO:0003824,GO:0004672,GO:0004674,GO:0005575,GO:0005623,GO:0005886,GO:0006464,GO:0006468,GO:0006793,GO:0006796,GO:0006807,GO:0008150,GO:0008152,GO:0009987,GO:0016020,GO:0016301,GO:0016310,GO:0016740,GO:0016772,GO:0016773,GO:0019538,GO:0036211,GO:0043170,GO:0043412,GO:0044237,GO:0044238,GO:0044260,GO:0044267,GO:0044464,GO:0071704,GO:0071944,GO:0140096,GO:1901564				LRR receptor-like serine threonine-protein kinase
HD.07G0019520	Chr05	220998682	221002313	+	2341	981085.XP_010086959.1		GO:0006950,GO:0006952,GO:0008150,GO:0009605,GO:0009607,GO:0009617,GO:0042742,GO:0043207,GO:0050896,GO:0051704,GO:0051707,GO:0098542				Belongs to the NPH3 family
HD.08G0016870	Chr05	92990610	92993545	+	1198	4432.XP_010267773.1		GO:0001101,GO:0003674,GO:0003824,GO:0004601,GO:0005575,GO:0005618,GO:0005622,GO:0005623,GO:0005634,GO:0005737,GO:0005783,GO:0005911,GO:0006950,GO:0006970,GO:0006972,GO:0008150,GO:0008152,GO:0009266,GO:0009269,GO:0009409,GO:0009414,GO:0009415,GO:0009505,GO:0009506,GO:0009628,GO:0009636,GO:0009651,GO:0009664,GO:0009987,GO:0010035,GO:0012505,GO:0016043,GO:0016209,GO:0016491,GO:0016684,GO:0030054,GO:…	1.11.1.7	ko:K00430	ko00940,ko01100,ko01110,map00940,map01100,map01110	Belongs to the peroxidase family. Classical plant (class III) peroxidase subfamily
HD.05004337	Chr05	67961817	67967719	-	703	161934.XP_010668020.1						SAM domain (Sterile alpha motif)
HD.08G0015140	Chr05	106694814	106701466	+	1393	29760.VIT_12s0059g01980.t01	ULT1	GO:0005575,GO:0005622,GO:0005623,GO:0005634,GO:0005737,GO:0005829,GO:0008150,GO:0009909,GO:0009910,GO:0043226,GO:0043227,GO:0043229,GO:0043231,GO:0044424,GO:0044444,GO:0044464,GO:0048519,GO:0048580,GO:0048581,GO:0048831,GO:0050789,GO:0050793,GO:0051093,GO:0051239,GO:0051241,GO:0065007,GO:2000026,GO:2000241,GO:2000242				ultrapetala
HD.08G0014130	Chr05	116161387	116162729	+	1343	4081.Solyc07g053750.1.1		GO:0000932,GO:0003674,GO:0003700,GO:0005575,GO:0005622,GO:0005623,GO:0005634,GO:0005737,GO:0006355,GO:0008150,GO:0009889,GO:0010029,GO:0010187,GO:0010468,GO:0010494,GO:0010556,GO:0019219,GO:0019222,GO:0031323,GO:0031326,GO:0032991,GO:0035770,GO:0036464,GO:0043226,GO:0043227,GO:0043228,GO:0043229,GO:0043231,GO:0043232,GO:0044424,GO:0044444,GO:0044464,GO:0048519,GO:0048580,GO:0048581,GO:0050789,GO:…				Zinc finger C-x8-C-x5-C-x3-H type (and similar)
