# Supplementary material for: Identification of QTL controlling volatile terpene contents in tea plant (Camellia sinensis) using a high-aroma ‘Huangdan’ x ‘Jinxuan’ F1 population
Source: Front Plant Sci. 2023 Mar 29;14:1130582. doi: 10.3389/fpls.2023.1130582 (PMC10090551; doi:10.3389/fpls.2023.1130582)
Supplement: Supplementary file 4 [file Table_3.xlsx]

## Sheet: Sheet1
Gene ID	Forward primer 5'-3′	Reverse primer 5'-3′
HD.08G0016410	GATGTGAAAGGGCTGCTGAG	CCCTTGTTAGCCTCCAATGC
HD.08G0016430	TTCCACAAAGGGCTCTGCAT	GGCTGGTAATTGGCTGATCG
HD.08G0016470	TTGCTCGGATTTCCCAATGC	CTCCTTATCAACTTTTGTATCTCCG
HD.08G0002490	CAATTTCAGCCGAGCAGTGG	ACCTGATTGAGCTTGTGTTGA
HD.08G0021230	GCTGCATTCTTTCCTCGGTT	CTTCCCAAGAAGCTCATGCC
HD.08G0006200	ATCATGCCGGGACAAACAAG	AGCTCTTCATCCTTCGTCGT
